# Supplementary material for: Adjunctive agents to antipsychotics in schizophrenia: a systematic umbrella review and recommendations for amino acids, hormonal therapies and anti-inflammatory drugs
Source: HighWire-hosted journal article supplement (doi:10.1136/bmjment-2023-300771), 2023-10-01
Supplement: bmjment-2023-300771supp001_data_supplement.pdf [file bmjment-2023-300771supp001_data_supplement.pdf]

## Adjunctive agents to antipsychotics in schizophrenia: A systematic umbrella review and recommendations for amino acids, hormonal therapies, and anti-inflammatory drugs

|                                   |                                                                                                                                      |    |
|-----------------------------------|--------------------------------------------------------------------------------------------------------------------------------------|----|
| <b>Supplementary material 1.</b>  | Detailed methodology for expert meetings, literature searches, inclusion criteria, data extraction and risk of bias assessment. .... | 2  |
| 1.                                | Expert meetings.....                                                                                                                 | 2  |
| 2.                                | Literature searches.....                                                                                                             | 3  |
| 3.                                | Inclusion criteria .....                                                                                                             | 3  |
| 4.                                | Data extraction .....                                                                                                                | 3  |
| 5.                                | Subgroups.....                                                                                                                       | 4  |
| 6.                                | Risk of bias assessment .....                                                                                                        | 4  |
| 7.                                | Main outcomes.....                                                                                                                   | 5  |
| <b>Supplementary material 2.</b>  | Characteristics of the 29 meta-analyses with their risk of bias.....                                                                 | 6  |
| <b>Supplementary material 3.</b>  | Methodology Checklist : Controlled Trials.....                                                                                       | 9  |
| Supplementary material 4.         | PRISMA Checklist. ....                                                                                                               | 11 |
| Supplementary material 5.         | Characteristics of the 63 randomized controlled trials (RCTs) with their risk of bias.                                               | 14 |
| Supplementary material 6.         | Detailed risk of bias analysis of the 63 randomized controlled trials (RCTs).                                                        | 25 |
| <b>Supplementary material 7.</b>  | Results supporting the recommendations: from Level of Evidence to WFSBP-Grade recommendations. ....                                  | 31 |
| <b>Supplementary material 8.</b>  | Context/rationale for the efficacy of each molecule, RCTs' global conclusions and risk of bias and subgroup analyses.....            | 40 |
|                                   | N-acetyl-cysteine (NAC) .....                                                                                                        | 40 |
|                                   | Sarcosine .....                                                                                                                      | 40 |
|                                   | Minocycline .....                                                                                                                    | 41 |
|                                   | PUFAs.....                                                                                                                           | 42 |
|                                   | COX inhibitors (Aspirin, Celecoxib).....                                                                                             | 43 |
|                                   | Estrogens and Selective Estrogen Receptor Modulators (SERM) .....                                                                    | 44 |
| <b>Supplementary material 9.</b>  | Complementary analyses on sample size, risk of bias and country economic status                                                      | 47 |
| <b>Supplementary material 10.</b> | References for supplementary material.....                                                                                           | 50 |

## Supplementary material 1. Detailed methodology for expert meetings, literature searches, inclusion criteria, data extraction and risk of bias assessment.

### 1. Expert meetings

A series of six expert meetings were organized by the French Schizophrenia Expert Center Network (foundation FondaMental) between January 2022 and June 2022 (once a month, 2-hour long each). The agents were selected if there were at least three RCTs and one meta-analysis published on it. In these meetings, two to three experts who conducted a systematic umbrella review, presented their conclusions to the whole expert network on one or two adjunctive agents for the treatment of schizophrenia. Levels of evidence were determined according to the criteria of the Scottish Intercollegiate Guidelines Network (SIGN) [1] for each individual RCT as recommended by the WFSBP [2]. A methodological meeting was organized to harmonize the quality rating of the working groups. In case of doubt, the raters were requested to choose the most favorable level of evidence to avoid any over-interpretation of the results. In case of non-consensus for one level of evidence, a consensus meeting with at least three authors was carried out (the two leading authors the first author). All expert clinicians and clinician researchers discussed the final results during the meeting sessions of the French Expert Schizophrenia Center Network. These data were then synthesized in an umbrella meta-review following WFSBP-grade recommendations [50]; importantly this method should not be confounded with the GRADE system [53].

As many molecules were only studied in few RCTs (much less than antipsychotics in comparison), we changed the wording from “strong recommendation” (corresponding to the WFSBP-grade 1 level) to “strong provisional recommendation” to indicate that further RCTs may have a high potential to modify the present recommendations (hence, provisional also applies to moderate and weak recommendations). According to WFSBP guidelines, “acceptability” ratings consider the following aspects: risk-benefit ratio (e.g., adverse effects, interactions), cost-benefit ratio, applicability in the target population, ethical and legal aspects, preferences of service users, and practicability” [2].

International experts were then contacted. The international expert was defined as a non-French expert who actively participated in a meta-analytic work including at least one of the molecules evaluated in the review or with an experience of graded recommendations or assessment of the risk of bias combined with being clinically active in treating patients with schizophrenia. The experts were asked to review and validate the conclusions of the selected and reviewed agents. This panel includes 9 experts (MB, MEB, MB, CUC, MF, JK, MS, IES, SMS). All molecules reached

consensus at the first step except hormonal therapies, for which there was a debate on safety. Recommendations for hormonal therapies were therefore downgraded.

## 2. Literature searches

Medline<sup>®</sup>, Cochrane<sup>®</sup>, Clinicaltrials.gov[1], EU Clinical Trials Register[2] databases were searched from their inception. The search paradigm was developed for Medline<sup>®</sup> and adapted for other databases: “schizophrenia or schizo-affective disorder or (first-episode psychosis) or (psychotic disorder)[Title/Abstract]” was combined with the following terms: (aspirin[Title/Abstract] OR celecoxib[Title/Abstract] “anti-inflammatory drugs”[Title/Abstract] OR N-acetyl-cysteine[Title/Abstract] OR NAC[Title/Abstract] OR raloxifen[Title/Abstract] OR estrogen[Title/Abstract] OR PUFA[Title/Abstract] OR omega-3[Title/Abstract] OR sarcosine[Title/Abstract] OR minocycline[Title/Abstract])), with a filter for randomized controlled trials, systematic reviews and meta-analyses. The references were manually searched to recover potentially missed RCTs

## 3. Inclusion criteria

**Participants.** Patients with schizophrenia, schizo-affective disorder, schizophreniform disorder and first-episode schizophrenia in stabilized or acute phase, in and outpatients.

**Interventions.** The adjunctive agents with at least three randomized controlled trials (RCTs) and one meta-analysis were included in the present work, and a leading author (or a pair/triad of leading authors) was convened on a voluntary basis to extract this data in a preform sheet and to rate the risk of bias. The choice to limit the work to agents with at least three RCTs was based on the GRADE recommendations, which suggests that at least three RCTs are necessary to conclude on effectiveness/ineffectiveness with the highest degree of confidence (Level Of Evidence (LoE)= A or -A)[3] and to limit the size of the work to the drugs with the most advanced evidence. The included agents (and reviewers) were (in order of decreasing evidence/number of RCTs): N-acetyl-cysteine (leading authors: FB and GF), minocycline (RR, HT and FB), poly-unsaturated fatty acids (PUFAs) (MU, DM and GF), estrogens (JM and GF), Selective estrogen receptor modulators (SERM)(BP and FB), celecoxib (FB and GF), aspirin (FS and GF), sarcosine (GF and FB).

The main outcomes were: effectiveness on positive symptoms, negative symptoms, general psychopathology (here referring to as the symptoms included in the PANSS-G subscale), total psychotic symptomatology and cognition (with any laboratory test but not with clinical scales like the PANSS cognitive factor). Secondary outcomes included adverse effects, all-cause of discontinuation (acceptability) and discontinuation due to adverse effects.

## 4. Data extraction

The following data were extracted by at least two authors: Study ID, country, Study population, Setting, Coinitiation or augmentation (antipsychotic treatment, flexible/fixed doses), total sample size (N treatment, N placebo), Dose of adjunctive treatment (mg/day), trial duration (weeks), effect on positive symptoms, negative symptoms, general psychopathology, total psychotic symptomatology and cognition (three modalities: significant improvement (“+”), non-significant effect (“ns”) or significant worsening (“-“)). For cognition, if some tests provided significant improvement and other non-significant results, “+/ns” was noted. If one test only was positive with a p value at the limit of significance (e.g. 0.04) with all other tests non-significant, this effect was attributed to multiple testing and the results were reported as non-significant (ns).

## 5. Subgroups

As the RCTs were heterogenous, we created some subgroups of the RCTs to determine if some precision-medicine recommendations could be provided. These subgroups were : first-episode schizophrenia/early-phase schizophrenia, chronic schizophrenia, stabilized schizophrenia, acute phase schizophrenia, augmentation design (i.e., adjunctive treatment added to stabilized antipsychotic), co-initiation design (i.e., in an acute phase), patients treated with clozapine, patients treated with other antipsychotics than clozapine (as clozapine is a proxy for treatment-resistant schizophrenia), trials including women only or men only, and childbearing-age women and post-menopausal women (these two last groups for hormonal therapy only).

Two studies explicitly reported that patients had predominant negative symptoms because the agents (here minocycline[4], and sarcosine[5]) were specifically tested for their effectiveness on negative symptoms. Thirty-three studies (52.4%) explicitly reported that patients had symptoms scoring above a certain cut-off (see Table SM4, column 3 "Study population").

As some authors have suggested that results may vary between high- and middle-income countries[6], we conducted additional sensitivity analyses in which we examined whether the probability of finding positive results was higher in upper middle-income countries compared to high-income countries. Upper middle-income countries were: China, India, Iran, Romania/Moldova, South Africa; high-income countries were: Australia, Norway, Poland, Spain, South Korea, Switzerland, the UK, and the USA[7].

Twenty-seven out of the included studies (42.9%) were carried out in upper middle-income countries (China, Iran, Romania, South Africa). Among the 24 studies with a low risk of bias, 12 (50.0%) were carried out in upper middle-income countries.

## 6. Risk of bias assessment

Levels of evidence were determined according to the criteria of the Scottish Intercollegiate Guidelines Network (SIGN)[8] as recommended in the World Journal of Biological Psychiatry

guidelines[3]. The following forms were fulfilled by each leading author for each RCT and meta-analysis (**Supplementary Material 2**).

A study was classified as “low risk of bias” if it was rated “high quality” according to SIGN criteria AND if the total sample size was  $\geq 30$  AND if there were no conflicts of interest. A study was classified as “moderate risk of bias” if it was rated “acceptable” on the SIGN criteria OR if there were conflicts of interest AND if the total sample size was  $\geq 30$ . A study was classified as “high risk of bias” if it was rated “low quality” on the SIGN criteria OR if the total sample size was  $< 30$ .

## 7. Main outcomes

The main outcomes were: effectiveness on positive symptoms, negative symptoms, general psychopathology, total psychotic symptomatology and cognition. Secondary outcomes included adverse effects, safety issues, all-cause of discontinuation (a proxy for acceptability) and discontinuation due to adverse effects. The last investigation was carried out on February 28, 2022.

## Supplementary material 2. Characteristics of the 29 meta-analyses with their risk of bias.

| Year                          | Study ID                                                                                                                                                                                                                                                                                                                            | N-acetyl-cysteine | Sarcosine | Minocycline | PUFAs | Estrogens | SERM | Aspirin | Celecoxib | Risk of bias |
|-------------------------------|-------------------------------------------------------------------------------------------------------------------------------------------------------------------------------------------------------------------------------------------------------------------------------------------------------------------------------------|-------------------|-----------|-------------|-------|-----------|------|---------|-----------|--------------|
| <b>Mixed adjunctive drugs</b> |                                                                                                                                                                                                                                                                                                                                     |                   |           |             |       |           |      |         |           |              |
| 2014                          | Sommer IE, van Westrhenen R, Begemann MJH, de Witte LD, Leucht S, Kahn RS. Efficacy of Anti-inflammatory Agents to Improve Symptoms in Patients With Schizophrenia: An Update. <i>Schizophr Bull.</i> 2014;40(1):181-191. doi:10.1093/schbul/sbt139                                                                                 | 1                 |           | 4           | 7     | 7         |      | 2       | 5         | Low          |
| 2019                          | Çakici N, van Beveren NJM, Judge-Hundal G, Koola MM, Sommer IEC. An update on the efficacy of anti-inflammatory agents for patients with schizophrenia: a meta-analysis. <i>Psychol Med.</i> 2019;49(14):2307-2319. doi:10.1017/S0033291719001995                                                                                   | 5                 |           | 12          | 14    | 6         | 5    | 2       | 5         | Low          |
| 2019                          | Cho M, Lee TY, Kwak YB, Yoon YB, Kim M, Kwon JS. Adjunctive use of anti-inflammatory drugs for schizophrenia: A meta-analytic investigation of randomized controlled trials. <i>Aust N Z J Psychiatry.</i> 2019;53(8):742-759. doi:10.1177/0004867419835028                                                                         | 2                 |           | 5           | 12    | 7         | 9    | 2       | 4         | Moderate     |
| 2019                          | Chang CH, Lane HY, Tseng PT, Chen SJ, Liu CY, Lin CH. Effect of N-methyl-D-aspartate-receptor-enhancing agents on cognition in patients with schizophrenia: A systematic review and meta-analysis of double-blind randomised controlled trials. <i>J Psychopharmacol Oxf Engl.</i> 2019;33(4):436-448. doi:10.1177/0269881118822157 | 2                 |           | 3           |       |           |      |         |           | Moderate     |
| 2020                          | Jeppesen R, Christensen RHB, Pedersen EMJ, et al. Efficacy and safety of anti-inflammatory agents in treatment of psychotic disorders - A comprehensive systematic review and meta-analysis. <i>Brain Behav Immun.</i> 2020;90:364-380. doi:10.1016/j.bbi.2020.08.028                                                               | 7                 |           | 8           | 14    | 6         | 7    | 2       | 3         | low          |
| <b>N-acetylcysteine</b>       |                                                                                                                                                                                                                                                                                                                                     |                   |           |             |       |           |      |         |           |              |
| 2016                          | Magalhães PVS, Dean O, Andrezza AC, Berk M, Kapczinski F. Antioxidant treatments for schizophrenia. Cochrane Schizophrenia Group, ed. <i>Cochrane Database Syst Rev.</i> Published online February 5, 2016. doi:10.1002/14651858.CD008919.pub2                                                                                      | 2                 |           |             |       |           |      |         |           | Moderate     |
| 2018                          | Zheng W, Zhang QE, Cai DB, et al. N-acetylcysteine for major mental disorders: a systematic review and meta-analysis of randomized controlled trials. <i>Acta Psychiatr Scand.</i> 2018;137(5):391-400. doi:10.1111/acps.12862                                                                                                      | 6                 |           |             |       |           |      |         |           | Moderate     |
| 2020                          | Yolland CO, Hanratty D, Neill E, et al. Meta-analysis of randomised controlled trials with N-acetylcysteine in the treatment of schizophrenia. <i>Aust N Z J Psychiatry.</i> 2020;54(5):453-466. doi:10.1177/0004867419893439                                                                                                       | 7                 |           |             |       |           |      |         |           | Low          |
| <b>Sarcosine</b>              |                                                                                                                                                                                                                                                                                                                                     |                   |           |             |       |           |      |         |           |              |
| 2010                          | Tsai GE, Lin PY. Strategies to enhance N-methyl-D-aspartate receptor-mediated neurotransmission in schizophrenia, a critical review and meta-analysis. <i>Curr Pharm Des.</i> 2010;16(5):522-537. doi:10.2174/138161210790361452                                                                                                    |                   | 3         |             |       |           |      |         |           | Moderate     |

| Year                                        | Study ID                                                                                                                                                                                                                                                                                                                | N-acetyl-cysteine | Sarcosine | Minocycline | PUFAs | Estrogens | SERM | Aspirin | Celecoxib | Risk of bias |
|---------------------------------------------|-------------------------------------------------------------------------------------------------------------------------------------------------------------------------------------------------------------------------------------------------------------------------------------------------------------------------|-------------------|-----------|-------------|-------|-----------|------|---------|-----------|--------------|
| 2011                                        | Singh SP, Singh V. Meta-analysis of the efficacy of adjunctive NMDA receptor modulators in chronic schizophrenia. <i>CNS Drugs</i> . 2011;25(10):859-885. doi:10.2165/11586650-000000000-00000                                                                                                                          |                   | 4         |             |       |           |      |         |           | Low          |
| 2020                                        | Chang CH, Lin CH, Liu CY, Chen SJ, Lane HY. Efficacy and cognitive effect of sarcosine (N-methylglycine) in patients with schizophrenia: A systematic review and meta-analysis of double-blind randomised controlled trials. <i>J Psychopharmacol Oxf Engl</i> . 2020;34(5):495-505. doi:10.1177/0269881120908016       |                   | 7         |             |       |           |      |         |           | Moderate     |
| 2021                                        | Marchi M, Galli G, Magarini FM, Mattei G, Galeazzi GM. Sarcosine as an add-on treatment to antipsychotic medication for people with schizophrenia: a systematic review and meta-analysis of randomized controlled trials. <i>Expert Opin Drug Metab Toxicol</i> . 2021;17(4):483-493. doi:10.1080/17425255.2021.1885648 |                   | 6         |             |       |           |      |         |           | Moderate     |
| 2021                                        | Goh KK, Wu TH, Chen CH, Lu ML. Efficacy of N-methyl-D-aspartate receptor modulator augmentation in schizophrenia: A meta-analysis of randomised, placebo-controlled trials. <i>J Psychopharmacol Oxf Engl</i> . 2021;35(3):236-252. doi:10.1177/0269881120965937                                                        |                   | 6         |             |       |           |      |         |           | Moderate     |
| <b>Minocycline</b>                          |                                                                                                                                                                                                                                                                                                                         |                   |           |             |       |           |      |         |           |              |
| 2014                                        | Oya K, Kishi T, Iwata N. Efficacy and tolerability of minocycline augmentation therapy in schizophrenia: a systematic review and meta-analysis of randomized controlled trials. <i>Hum Psychopharmacol</i> . 2014;29(5):483-491. doi:10.1002/hup.2426                                                                   |                   |           | 4           |       |           |      |         |           | Moderate     |
| 2017                                        | Solmi M, Veronese N, Thapa N, et al. Systematic review and meta-analysis of the efficacy and safety of minocycline in schizophrenia. <i>CNS Spectr</i> . 2017;22(5):415-426. doi:10.1017/S1092852916000638                                                                                                              |                   |           | 6           |       |           |      |         |           | Low          |
| 2017                                        | Xiang YQ, Zheng W, Wang SB, et al. Adjunctive minocycline for schizophrenia: A meta-analysis of randomized controlled trials. <i>Eur Neuropsychopharmacol J Eur Coll Neuropsychopharmacol</i> . 2017;27(1):8-18. doi:10.1016/j.euroneuro.2016.11.012                                                                    |                   |           | 8           |       |           |      |         |           | Moderate     |
| 2019                                        | Zheng W, Zhu XM, Zhang QE, et al. Adjunctive minocycline for major mental disorders: A systematic review. <i>J Psychopharmacol Oxf Engl</i> . 2019;33(10):1215-1226. doi:10.1177/0269881119858286                                                                                                                       |                   |           | 13          |       |           |      |         |           | Moderate     |
| <b>Poly-unsaturated fatty acids (PUFAs)</b> |                                                                                                                                                                                                                                                                                                                         |                   |           |             |       |           |      |         |           |              |
| 2006                                        | Joy CB, Mumbay-Croft R, Joy LA. Polyunsaturated fatty acid supplementation for schizophrenia. <i>Cochrane Database Syst Rev</i> . 2006;(3):CD001257. doi:10.1002/14651858.CD001257.pub2                                                                                                                                 |                   |           |             | 8     |           |      |         |           | Low          |
| 2012                                        | Fusar-Poli P, Berger G. Eicosapentaenoic acid interventions in schizophrenia: meta-analysis of randomized, placebo-controlled studies. <i>J Clin Psychopharmacol</i> . 2012;32(2):179-185. doi:10.1097/JCP.0b013e318248b7bb                                                                                             |                   |           |             | 7     |           |      |         |           | Low          |
| 2015                                        | Chen AT, Chibnall JT, Nasrallah HA. A meta-analysis of placebo-controlled trials of omega-3 fatty acid augmentation in schizophrenia: Possible stage-specific                                                                                                                                                           |                   |           |             | 10    |           |      |         |           | Moderate     |

| Year                                                               | Study ID                                                                                                                                                                                                                                                                                        | N-acetyl-cysteine | Sarcosine | Minocycline | PUFAs | Estrogens | SERM | Aspirin | Celecoxib | Risk of bias |
|--------------------------------------------------------------------|-------------------------------------------------------------------------------------------------------------------------------------------------------------------------------------------------------------------------------------------------------------------------------------------------|-------------------|-----------|-------------|-------|-----------|------|---------|-----------|--------------|
|                                                                    | effects. <i>Ann Clin Psychiatry Off J Am Acad Clin Psychiatr.</i> 2015;27(4):289-296.                                                                                                                                                                                                           |                   |           |             |       |           |      |         |           |              |
| 2021                                                               | Goh KK, Chen CYA, Chen CH, Lu ML. Effects of omega-3 polyunsaturated fatty acids supplements on psychopathology and metabolic parameters in schizophrenia: A meta-analysis of randomized controlled trials. <i>J Psychopharmacol Oxf Engl.</i> 2021;35(3):221-235. doi:10.1177/0269881120981392 |                   |           |             | 17    |           |      |         |           | Moderate     |
| <b>Estrogens and Selective estrogen receptor modulators (SERM)</b> |                                                                                                                                                                                                                                                                                                 |                   |           |             |       |           |      |         |           |              |
| 2012                                                               | Begemann MJH, Dekker CF, van Lunenburg M, Sommer IE. Estrogen augmentation in schizophrenia: a quantitative review of current evidence. <i>Schizophr Res.</i> 2012;141(2-3):179-184. doi:10.1016/j.schres.2012.08.016                                                                           |                   |           |             |       | 5         |      |         |           | Low          |
| 2018                                                               | Zhu XM, Zheng W, Li XH, et al. Adjunctive raloxifene for postmenopausal women with schizophrenia: A meta-analysis of randomized, double-blind, placebo-controlled trials. <i>Schizophr Res.</i> 2018;197:288-293. doi:10.1016/j.schres.2018.01.017                                              |                   |           |             |       |           | 5    |         |           | Moderate     |
| 2018                                                               | de Boer J, Prikken M, Lei WU, Begemann M, Sommer I. The effect of raloxifene augmentation in men and women with a schizophrenia spectrum disorder: a systematic review and meta-analysis. <i>NPJ Schizophr.</i> 2018;4(1):1. doi:10.1038/s41537-017-0043-3                                      |                   |           |             |       |           | 9    |         |           | Low          |
| 2018                                                               | Wang Q, Dong X, Wang Y, Li X. Raloxifene as an adjunctive treatment for postmenopausal women with schizophrenia: a meta-analysis of randomized controlled trials. <i>Arch Womens Ment Health.</i> 2018;21(1):31-41. doi:10.1007/s00737-017-0773-2                                               |                   |           |             |       |           | 6    |         |           | Moderate     |
| <b>COX inhibitors</b>                                              |                                                                                                                                                                                                                                                                                                 |                   |           |             |       |           |      |         |           |              |
| 2012                                                               | Sommer IE, de Witte L, Begemann M, Kahn RS. Nonsteroidal anti-inflammatory drugs in schizophrenia: ready for practice or a good start? A meta-analysis. <i>J Clin Psychiatry.</i> 2012;73(4):414-419. doi:10.4088/JCP.10r06823                                                                  |                   |           |             |       |           |      | 1       | 4         | Low          |
| 2013                                                               | Nitta M, Kishimoto T, Müller N, et al. Adjunctive use of nonsteroidal anti-inflammatory drugs for schizophrenia: a meta-analytic investigation of randomized controlled trials. <i>Schizophr Bull.</i> 2013;39(6):1230-1241. doi:10.1093/schbul/sbt070                                          |                   |           |             |       |           |      | 2       | 6         | Low          |
| 2017                                                               | Zheng W, Cai DB, Yang XH, et al. Adjunctive celecoxib for schizophrenia: A meta-analysis of randomized, double-blind, placebo-controlled trials. <i>J Psychiatr Res.</i> 2017;92:139-146. doi:10.1016/j.jpsychires.2017.04.004                                                                  |                   |           |             |       |           |      |         | 8         | Moderate     |
| 2021                                                               | Weiser M, Zamora D, Levi L, et al. Adjunctive Aspirin vs Placebo in Patients With Schizophrenia: Results of Two Randomized Controlled Trials. <i>Schizophr Bull.</i> 2021;47(4):1077-1087. doi:10.1093/schbul/sbaa198                                                                           |                   |           |             |       |           |      | 4       |           | Low          |



## Supplementary material 3. Methodology Checklist : Controlled Trials.

|  SIGN                                                                                                                                                                                                                                                                                                                                                                                                                                                                                                                                                                         |                                                                                                                                           | Methodology Checklist : Controlled Trials                          |                                                                        |
|----------------------------------------------------------------------------------------------------------------------------------------------------------------------------------------------------------------------------------------------------------------------------------------------------------------------------------------------------------------------------------------------------------------------------------------------------------------------------------------------------------------------------------------------------------------------------------------------------------------------------------------------------------------|-------------------------------------------------------------------------------------------------------------------------------------------|--------------------------------------------------------------------|------------------------------------------------------------------------|
| Study identification ( <i>Include author, title, year of publication, journal title, pages</i> )                                                                                                                                                                                                                                                                                                                                                                                                                                                                                                                                                               |                                                                                                                                           |                                                                    |                                                                        |
| Guideline topic:                                                                                                                                                                                                                                                                                                                                                                                                                                                                                                                                                                                                                                               |                                                                                                                                           | Key Question No:                                                   | Reviewer:                                                              |
| <p><b>Before</b> completing this checklist, consider:</p> <ol style="list-style-type: none"> <li>1. Is the paper a <b>randomised controlled trial</b> or a <b>controlled clinical trial</b>? If in doubt, check the study design algorithm available from SIGN and make sure you have the correct checklist. If it is a <b>controlled clinical trial</b> questions 1.2, 1.3, and 1.4 are not relevant, and the study cannot be rated higher than 1+</li> <li>2. Is the paper relevant to key question? Analyse using PICO (Patient or Population Intervention Comparison Outcome). IF NO REJECT (give reason below). IF YES complete the checklist.</li> </ol> |                                                                                                                                           |                                                                    |                                                                        |
| Reason for rejection: 1. Paper not relevant to key question <input type="checkbox"/> 2. Other reason <input type="checkbox"/> (please specify):                                                                                                                                                                                                                                                                                                                                                                                                                                                                                                                |                                                                                                                                           |                                                                    |                                                                        |
| <b>Section 1: Internal validity</b>                                                                                                                                                                                                                                                                                                                                                                                                                                                                                                                                                                                                                            |                                                                                                                                           |                                                                    |                                                                        |
| <b><i>In a well conducted RCT study...</i></b>                                                                                                                                                                                                                                                                                                                                                                                                                                                                                                                                                                                                                 |                                                                                                                                           | Does this study do it?                                             |                                                                        |
| 1.1                                                                                                                                                                                                                                                                                                                                                                                                                                                                                                                                                                                                                                                            | The study addresses an appropriate and clearly focused question.                                                                          | Yes <input type="checkbox"/>                                       | No <input type="checkbox"/><br>Can't say <input type="checkbox"/>      |
| 1.2                                                                                                                                                                                                                                                                                                                                                                                                                                                                                                                                                                                                                                                            | The assignment of subjects to treatment groups is randomised.                                                                             | Yes <input type="checkbox"/>                                       | No <input type="checkbox"/><br>Can't say <input type="checkbox"/>      |
| 1.3                                                                                                                                                                                                                                                                                                                                                                                                                                                                                                                                                                                                                                                            | An adequate concealment method is used.                                                                                                   | Yes <input type="checkbox"/>                                       | No <input type="checkbox"/><br>Can't say <input type="checkbox"/>      |
| 1.4                                                                                                                                                                                                                                                                                                                                                                                                                                                                                                                                                                                                                                                            | The design keeps subjects and investigators 'blind' about treatment allocation.                                                           | Yes <input type="checkbox"/>                                       | No <input type="checkbox"/><br>Can't say <input type="checkbox"/>      |
| 1.5                                                                                                                                                                                                                                                                                                                                                                                                                                                                                                                                                                                                                                                            | The treatment and control groups are similar at the start of the trial.                                                                   | Yes <input type="checkbox"/>                                       | No <input type="checkbox"/><br>Can't say <input type="checkbox"/>      |
| 1.6                                                                                                                                                                                                                                                                                                                                                                                                                                                                                                                                                                                                                                                            | The only difference between groups is the treatment under investigation.                                                                  | Yes <input type="checkbox"/>                                       | No <input type="checkbox"/><br>Can't say <input type="checkbox"/>      |
| 1.7                                                                                                                                                                                                                                                                                                                                                                                                                                                                                                                                                                                                                                                            | All relevant outcomes are measured in a standard, valid and reliable way.                                                                 | Yes <input type="checkbox"/>                                       | No <input type="checkbox"/><br>Can't say <input type="checkbox"/>      |
| 1.8                                                                                                                                                                                                                                                                                                                                                                                                                                                                                                                                                                                                                                                            | What percentage of the individuals or clusters recruited into each treatment arm of the study dropped out before the study was completed? |                                                                    |                                                                        |
| 1.9                                                                                                                                                                                                                                                                                                                                                                                                                                                                                                                                                                                                                                                            | All the subjects are analysed in the groups to which they were randomly allocated (often referred to as intention to treat analysis).     | Yes <input type="checkbox"/><br>Can't say <input type="checkbox"/> | No <input type="checkbox"/><br>Does not apply <input type="checkbox"/> |

|          |                                                                                             |                                                                    |                                                                        |
|----------|---------------------------------------------------------------------------------------------|--------------------------------------------------------------------|------------------------------------------------------------------------|
| 1.1<br>0 | Where the study is carried out at more than one site, results are comparable for all sites. | Yes <input type="checkbox"/><br>Can't say <input type="checkbox"/> | No <input type="checkbox"/><br>Does not apply <input type="checkbox"/> |
|----------|---------------------------------------------------------------------------------------------|--------------------------------------------------------------------|------------------------------------------------------------------------|

## Supplementary material 4. PRISMA Checklist.

| Section and Topic             | Item # | Checklist item                                                                                                                                                                                                                                                                                       | Location where item is reported |
|-------------------------------|--------|------------------------------------------------------------------------------------------------------------------------------------------------------------------------------------------------------------------------------------------------------------------------------------------------------|---------------------------------|
| <b>TITLE</b>                  |        |                                                                                                                                                                                                                                                                                                      |                                 |
| Title                         | 1      | Identify the report as a systematic review.                                                                                                                                                                                                                                                          | P1                              |
| <b>ABSTRACT</b>               |        |                                                                                                                                                                                                                                                                                                      |                                 |
| Abstract                      | 2      | See the PRISMA 2020 for Abstracts checklist.                                                                                                                                                                                                                                                         | P3                              |
| <b>INTRODUCTION</b>           |        |                                                                                                                                                                                                                                                                                                      |                                 |
| Rationale                     | 3      | Describe the rationale for the review in the context of existing knowledge.                                                                                                                                                                                                                          | P4-P5                           |
| Objectives                    | 4      | Provide an explicit statement of the objective(s) or question(s) the review addresses.                                                                                                                                                                                                               | P5                              |
| <b>METHODS</b>                |        |                                                                                                                                                                                                                                                                                                      |                                 |
| Eligibility criteria          | 5      | Specify the inclusion and exclusion criteria for the review and how studies were grouped for the syntheses.                                                                                                                                                                                          | SM1                             |
| Information sources           | 6      | Specify all databases, registers, websites, organisations, reference lists and other sources searched or consulted to identify studies. Specify the date when each source was last searched or consulted.                                                                                            | SM1                             |
| Search strategy               | 7      | Present the full search strategies for all databases, registers and websites, including any filters and limits used.                                                                                                                                                                                 | SM1                             |
| Selection process             | 8      | Specify the methods used to decide whether a study met the inclusion criteria of the review, including how many reviewers screened each record and each report retrieved, whether they worked independently, and if applicable, details of automation tools used in the process.                     | P5+SM1                          |
| Data collection process       | 9      | Specify the methods used to collect data from reports, including how many reviewers collected data from each report, whether they worked independently, any processes for obtaining or confirming data from study investigators, and if applicable, details of automation tools used in the process. | P5+SM1                          |
| Data items                    | 10a    | List and define all outcomes for which data were sought. Specify whether all results that were compatible with each outcome domain in each study were sought (e.g. for all measures, time points, analyses), and if not, the methods used to decide which results to collect.                        | P5-P6+SM1                       |
|                               | 10b    | List and define all other variables for which data were sought (e.g. participant and intervention characteristics, funding sources). Describe any assumptions made about any missing or unclear information.                                                                                         | P5-P6+SM1                       |
| Study risk of bias assessment | 11     | Specify the methods used to assess risk of bias in the included studies, including details of the tool(s) used, how many reviewers assessed each study and whether they worked independently, and if applicable, details of automation tools used in the process.                                    | SM1                             |
| Effect measures               | 12     | Specify for each outcome the effect measure(s) (e.g. risk ratio, mean difference) used in the synthesis or presentation of results.                                                                                                                                                                  | SM1                             |
| Synthesis methods             | 13a    | Describe the processes used to decide which studies were eligible for each synthesis (e.g. tabulating the study intervention characteristics and comparing against the planned groups for each synthesis (item #5)).                                                                                 | SM1                             |
|                               | 13b    | Describe any methods required to prepare the data for presentation or synthesis, such as handling of missing summary statistics, or data conversions.                                                                                                                                                | SM1                             |
|                               | 13c    | Describe any methods used to tabulate or visually display results of individual studies and syntheses.                                                                                                                                                                                               | SM1                             |
|                               | 13d    | Describe any methods used to synthesize results and provide a rationale for the choice(s). If meta-analysis was performed, describe the model(s), method(s) to identify the presence and extent of statistical heterogeneity, and software package(s) used.                                          | SM1                             |
|                               | 13e    | Describe any methods used to explore possible causes of heterogeneity among study results (e.g. subgroup analysis, meta-regression).                                                                                                                                                                 | P5/6+SM1                        |
|                               | 13f    | Describe any sensitivity analyses conducted to assess robustness of the synthesized results.                                                                                                                                                                                                         | P5/6+SM1                        |

| Section and Topic             | Item # | Checklist item                                                                                                                                                                                                                                                                       | Location where item is reported |
|-------------------------------|--------|--------------------------------------------------------------------------------------------------------------------------------------------------------------------------------------------------------------------------------------------------------------------------------------|---------------------------------|
| Reporting bias assessment     | 14     | Describe any methods used to assess risk of bias due to missing results in a synthesis (arising from reporting biases).                                                                                                                                                              | SM1                             |
| Certainty assessment          | 15     | Describe any methods used to assess certainty (or confidence) in the body of evidence for an outcome.                                                                                                                                                                                | SM1                             |
| <b>RESULTS</b>                |        |                                                                                                                                                                                                                                                                                      |                                 |
| Study selection               | 16a    | Describe the results of the search and selection process, from the number of records identified in the search to the number of studies included in the review, ideally using a flow diagram.                                                                                         | P6+SM2                          |
|                               | 16b    | Cite studies that might appear to meet the inclusion criteria, but which were excluded, and explain why they were excluded.                                                                                                                                                          | P6+SM2                          |
| Study characteristics         | 17     | Cite each included study and present its characteristics.                                                                                                                                                                                                                            | P6+SM2                          |
| Risk of bias in studies       | 18     | Present assessments of risk of bias for each included study.                                                                                                                                                                                                                         | SM1                             |
| Results of individual studies | 19     | For all outcomes, present, for each study: (a) summary statistics for each group (where appropriate) and (b) an effect estimate and its precision (e.g. confidence/credible interval), ideally using structured tables or plots.                                                     | NA                              |
| Results of syntheses          | 20a    | For each synthesis, briefly summarise the characteristics and risk of bias among contributing studies.                                                                                                                                                                               | P6-13+SM2                       |
|                               | 20b    | Present results of all statistical syntheses conducted. If meta-analysis was done, present for each the summary estimate and its precision (e.g. confidence/credible interval) and measures of statistical heterogeneity. If comparing groups, describe the direction of the effect. | P6-13+SM2                       |
|                               | 20c    | Present results of all investigations of possible causes of heterogeneity among study results.                                                                                                                                                                                       | P6-13+SM2                       |
|                               | 20d    | Present results of all sensitivity analyses conducted to assess the robustness of the synthesized results.                                                                                                                                                                           | P6-13+SM2                       |
| Reporting biases              | 21     | Present assessments of risk of bias due to missing results (arising from reporting biases) for each synthesis assessed.                                                                                                                                                              | P6-13+SM2                       |
| Certainty of evidence         | 22     | Present assessments of certainty (or confidence) in the body of evidence for each outcome assessed.                                                                                                                                                                                  | P6-13+SM2                       |
| <b>DISCUSSION</b>             |        |                                                                                                                                                                                                                                                                                      |                                 |
| Discussion                    | 23a    | Provide a general interpretation of the results in the context of other evidence.                                                                                                                                                                                                    | P13-17                          |
|                               | 23b    | Discuss any limitations of the evidence included in the review.                                                                                                                                                                                                                      | P13-17                          |
|                               | 23c    | Discuss any limitations of the review processes used.                                                                                                                                                                                                                                | P13-17                          |
|                               | 23d    | Discuss implications of the results for practice, policy, and future research.                                                                                                                                                                                                       | P13-17                          |
| <b>OTHER INFORMATION</b>      |        |                                                                                                                                                                                                                                                                                      |                                 |
| Registration and protocol     | 24a    | Provide registration information for the review, including register name and registration number, or state that the review was not registered.                                                                                                                                       |                                 |
|                               | 24b    | Indicate where the review protocol can be accessed, or state that a protocol was not prepared.                                                                                                                                                                                       |                                 |
|                               | 24c    | Describe and explain any amendments to information provided at registration or in the protocol.                                                                                                                                                                                      |                                 |
| Support                       | 25     | Describe sources of financial or non-financial support for the review, and the role of the funders or sponsors in the review.                                                                                                                                                        | P18                             |

| Section and Topic                              | Item # | Checklist item                                                                                                                                                                                                                             | Location where item is reported |
|------------------------------------------------|--------|--------------------------------------------------------------------------------------------------------------------------------------------------------------------------------------------------------------------------------------------|---------------------------------|
| Competing interests                            | 26     | Declare any competing interests of review authors.                                                                                                                                                                                         | P18                             |
| Availability of data, code and other materials | 27     | Report which of the following are publicly available and where they can be found: template data collection forms; data extracted from included studies; data used for all analyses; analytic code; any other materials used in the review. |                                 |

From: Page MJ, McKenzie JE, Bossuyt PM, Boutron I, Hoffmann TC, Mulrow CD, et al. The PRISMA 2020 statement: an updated guideline for reporting systematic reviews. *BMJ* 2021;372:n71. doi: 10.1136/bmj.n71  
For more information, visit: <http://www.prisma-statement.org/>

## Supplementary material 5. Characteristics of the 63 randomized controlled trials (RCTs) with their risk of bias.

| Study ID                                                                      | Country     | Study population                | Setting     | Coinitiation or augmentation (antipsychotic treatment, flexible/fixed doses) | N              | Dose (mg/day)     | Duration (weeks) | Positive symptoms PANSS-P | Negative symptoms PANSS-N | General psychopathology PANSS-G | Total psychotic symptoms PANSS-T | Cognition | Risk of bias |
|-------------------------------------------------------------------------------|-------------|---------------------------------|-------------|------------------------------------------------------------------------------|----------------|-------------------|------------------|---------------------------|---------------------------|---------------------------------|----------------------------------|-----------|--------------|
| <b>N-acetyl-cysteine (NAC). 8 RCTs. N total=523, N NAC=258, N placebo=265</b> |             |                                 |             |                                                                              |                |                   |                  |                           |                           |                                 |                                  |           |              |
| <b>Early-phase schizophrenia</b>                                              |             |                                 |             |                                                                              |                |                   |                  |                           |                           |                                 |                                  |           |              |
| Conus et al. (2018)                                                           | Switzerland | Early psychosis                 | Outpatients | Augmentation (FGA + SGA, flexible dose)                                      | 61 (31 vs 30)  | 2700              | 26               | ns                        | ns                        | ns                              | ns                               | +/ns      | Low          |
| Breier et al. (2018)                                                          | USA         | Early schizophrenia             | Outpatients | Augmentation (FGA + SGA, flexible dose)                                      | 32 (14 vs 18)  | 600-3600 titrate  | 52               | ns                        | +                         | ns                              | +                                | ns        | Moderate     |
| Davis et al. (2014)                                                           | USA         | Early and chronic schizophrenia | Outpatients | Augmentation (FGA + SGA, unspecified flexible dose)                          | 17 (8 vs 9)    | 1200              | 8                | ns                        | ns                        | ns                              | ns                               | ns        | Moderate     |
| <b>Chronic schizophrenia</b>                                                  |             |                                 |             |                                                                              |                |                   |                  |                           |                           |                                 |                                  |           |              |
| Berk et al. (2008)                                                            | Australia   | Chronic schizophrenia           | Outpatients | Augmentation (FGA + SGA, flexible dose)                                      | 139 (68 vs 71) | 2000              | 24               | ns                        | +                         | +                               | +                                | NA        | Moderate     |
| Rapado-Castro et al. (2017)                                                   | Australia   | Chronic schizophrenia           | Outpatients | Augmentation (FGA + SGA, flexible dose)                                      | 32 (15 vs 17)  | 2000              | 24               | NA                        | NA                        | NA                              | NA                               | +/ns      | Moderate     |
| Sepehrmanesh et al. (2018)                                                    | Iran        | Chronic schizophrenia           | Outpatients | Augmentation (FGA + SGA + anti-cholinergic agents, fixed dose)               | 79 (40 vs 39)  | 1200              | 12               | +                         | +                         | +                               | +                                | +/ns      | Low          |
| <b>Acute phase</b>                                                            |             |                                 |             |                                                                              |                |                   |                  |                           |                           |                                 |                                  |           |              |
| Zhang et al. (2015)                                                           | China       | First episode                   | NA          | Coinitiation (risperidone)                                                   | 121 (61 vs 60) | 600               | 8                | +                         | +                         | NA                              | +                                | NA        | High         |
| Farokhnia et al. (2013)                                                       | Iran        | Chronic schizophrenia           | Inpatients  | Coinitiation (risperidone flexible dose)                                     | 42 (21 vs 21)  | 1000-2000 titrate | 8                | ns                        | +                         | ns                              | +                                | NA        | Low          |

| <b>Sarcosine, 6 RCTs. N total=211. N sarcosine= 104. N placebo= 107</b> |        |                                                                                                                                               |                       |                                                                                                             |                  |      |    |    |    |    |    |      |          |
|-------------------------------------------------------------------------|--------|-----------------------------------------------------------------------------------------------------------------------------------------------|-----------------------|-------------------------------------------------------------------------------------------------------------|------------------|------|----|----|----|----|----|------|----------|
| <b>Chronic schizophrenia</b>                                            |        |                                                                                                                                               |                       |                                                                                                             |                  |      |    |    |    |    |    |      |          |
| Tsai et al. 2004                                                        | Taiwan | Chronic schizophrenia<br>Comorbid major depressive<br>episode excluded                                                                        | In and<br>outpatients | Augmentation<br>(FGA + SGA,<br>fixed dose,<br>stable at least<br>for 3 months,<br>one patient<br>untreated) | 36 (16<br>vs 20) | 2000 | 6  | +  | +  | +  | +  | NA   | High     |
| Lane et al.<br>2010                                                     | Taiwan | Unremitted chronic<br>schizophrenia (PANSS>60)<br>18-60 years without<br>abnormal biochemical test<br>History of substance abuse,<br>excluded | Inpatients            | Augmentation<br>(SGA, fixed<br>dose, stable at<br>least for 3<br>months)                                    | 35 (19<br>vs 16) | 2000 | 6  | NA | +  | NA | +  | NA   | Moderate |
| Lin et al. 2015                                                         | Taiwan | Unremitted chronic<br>schizophrenia (PANSS>60)<br>18-60 years without<br>abnormal biochemical test<br>History of substance abuse,<br>excluded | Inpatients            | Augmentation<br>(SGA, fixed<br>dose, stable at<br>least for 2<br>months)                                    | 32 (16<br>vs 16) | 2000 | 12 | ns | ns | ns | ns | +/ns | Moderate |
| Strzelecki et al.<br>2015                                               | Poland | Schizophrenia with dominant<br>negative symptoms, acute<br>psychosis and suicidal<br>ideations excluded<br>18-60 years                        | Outpatients           | Augmentation<br>(FGA + SGA<br>excluding<br>clozapine, fixed<br>dose, stable at<br>least for 3<br>months)    | 50 (25<br>vs 25) | 2000 | 24 | NA | +  | NA | +  | NA   | Moderate |
| <b>Treatment-resistant schizophrenia</b>                                |        |                                                                                                                                               |                       |                                                                                                             |                  |      |    |    |    |    |    |      |          |
| Lane et al.<br>(2006)                                                   | Taiwan | Resistant chronic<br>schizophrenia (PANSS>70)<br>Comorbid major depressive<br>episode excluded                                                | Inpatients            | Augmentation<br>(Clozapine,<br>fixed dose,<br>stable for at<br>least 3 months)                              | 20 (10<br>vs 10) | 2000 | 6  | ns | ns | ns | ns | ns   | High     |
|                                                                         |        |                                                                                                                                               |                       |                                                                                                             |                  |      |    |    |    |    |    |      |          |
| Acute phase                                                             |        |                                                                                                                                               |                       |                                                                                                             |                  |      |    |    |    |    |    |      |          |
| Lane et al.<br>(2005)                                                   | Taiwan | Chronic schizophrenia<br>(PANSS>60)                                                                                                           | Inpatients            | Coinitiation<br>(Risperidone,<br>flexible dose)                                                             | 38 (18<br>vs 20) | 2000 | 6  | ns | +  | +  | +  | NA   | Moderate |

|                                                                          |                   |                                                                                                                                                                                                                                     |                           |                                                               |               |                                 |    |    |    |    |    |    |    |          |
|--------------------------------------------------------------------------|-------------------|-------------------------------------------------------------------------------------------------------------------------------------------------------------------------------------------------------------------------------------|---------------------------|---------------------------------------------------------------|---------------|---------------------------------|----|----|----|----|----|----|----|----------|
|                                                                          |                   | 18-60 years without abnormal biochemical test<br>History of substance abuse and smokers excluded                                                                                                                                    |                           |                                                               |               |                                 |    |    |    |    |    |    |    |          |
| <b>Minocycline 8 RCTs, N total=583, N minocycline=298, N placebo=285</b> |                   |                                                                                                                                                                                                                                     |                           |                                                               |               |                                 |    |    |    |    |    |    |    |          |
| <b>Early-phase schizophrenia</b>                                         |                   |                                                                                                                                                                                                                                     |                           |                                                               |               |                                 |    |    |    |    |    |    |    |          |
| Chaudhry et al. (2012)                                                   | Brazil & Pakistan | Early schizophrenia spectrum disorder (≤5 years of illness duration)<br>Stable medication > 4 weeks                                                                                                                                 | In- and outpatients       | Augmentation (SGA+FGA unspecified, flexible dose unspecified) | 94 (46 vs 48) | 50-200 titrate within 8 weeks   | 52 | ns | +  | ns | ns | ns | ns | Moderate |
| Liu et al. (2014)                                                        | China             | Early Schizophrenia (≤5 years of illness duration)                                                                                                                                                                                  | Outpatients (unspecified) | Augmentation (Risperidone, fixed dose)                        | 63 (30 vs 33) | 200                             | 16 | ns | +  | ns | +  | ns | ns | Moderate |
| Deakin et al. (2018)                                                     | UK                | First episode schizophrenia, schizoaffective or schizophreniform disorder (≤5 years of illness duration)<br>PANSS positive items >2 (P1 delusions, P2 conceptual disorganisation, P3 hallucinatory behaviour, or P6 suspiciousness) | Outpatients               | Augmentation (FGA and SGA, fixed dose)                        | 89 (41 vs 48) | 300 (200 for 2 weeks, then 300) | 52 | ns | ns | ns | ns | ns | NA | Low      |
| <b>Chronic schizophrenia</b>                                             |                   |                                                                                                                                                                                                                                     |                           |                                                               |               |                                 |    |    |    |    |    |    |    |          |
| Khodaie-Ardakani et al. (2014)                                           | Iran              | Chronic schizophrenia >2 years of illness duration<br>stable dose of risperidone for > 8 weeks<br>clinically stable for > 4 weeks<br>patients with depression excluded                                                              | Outpatients               | Augmentation (Risperidone, flexible dose)                     | 38 (20 vs 18) | 200 (100 for 1 week then 200)   | 8  | ns | +  | +  | +  | +  | NA | Low      |
| <b>Resistant schizophrenia</b>                                           |                   |                                                                                                                                                                                                                                     |                           |                                                               |               |                                 |    |    |    |    |    |    |    |          |
| Kelly et al. (2015)                                                      | USA               | Chronic schizophrenia or schizoaffective disorder                                                                                                                                                                                   | In- and outpatients       | Augmentation (clozapine, fixed dose)                          | 50 (27 vs 23) | 200                             | 10 | ns | ns | ns | ns | ns | ns | Low      |



|                                                               |                      | clozapine for >6 months,<br>>200 mg/day, >350 ng/ml<br>(BPRS >= 45 OR CGI >= 4)<br>AND BPRS-P > 8                                                                                                                         |                                         |                                                                           |                                        | (100 for 1<br>week,<br>then 200) |                                                                    |    |                                   |    |    |     |          |
|---------------------------------------------------------------|----------------------|---------------------------------------------------------------------------------------------------------------------------------------------------------------------------------------------------------------------------|-----------------------------------------|---------------------------------------------------------------------------|----------------------------------------|----------------------------------|--------------------------------------------------------------------|----|-----------------------------------|----|----|-----|----------|
| <b>Acute phase</b>                                            |                      |                                                                                                                                                                                                                           |                                         |                                                                           |                                        |                                  |                                                                    |    |                                   |    |    |     |          |
| Levkovitz et al.<br>(2010)                                    | Israel               | Early schizophrenia<br>(≤5 years of first<br>antipsychotic exposure)<br>PANSS > 60<br>Antipsychotic initiation =< 14<br>days<br>Exclusion of patients with ><br>25% improvement after the<br>placebo lead-in phase        | In- and<br>outpatients<br>(unspecified) | Coinitiation<br>(SGA including<br>clozapine,<br>flexible dose)            | 12 (13<br>vs 8)                        | 200                              | 22<br>Prece<br>eded<br>by a 2<br>week<br>s<br>lead-<br>in<br>phase | ns | + (SANS) /<br>ns<br>(PANSS-<br>N) | ns | ns | +/- | High     |
| Zhang et al.<br>(2018) (3<br>arms)                            | China                | Chronic schizophrenia<br>PANSS-N > 20; at least one<br>PANSS-N item >= 4; PANSS-<br>N > PANSS-P; PANSS-P,<br>duration of illness from 2-10<br>years<br>antipsychotic free for >= 2<br>weeks                               | In- and<br>outpatients                  | Coinitiation<br>(Risperidone,<br>flexible dose 3<br>to 6 mg)              | 37 (18<br>(200m<br>g/day)<br>vs 19)    | 200                              | 12                                                                 | Ns | +                                 | Ns | Ns | NA  | Low      |
|                                                               |                      |                                                                                                                                                                                                                           |                                         |                                                                           | 39<br>(20(10<br>0mg/<br>day)<br>vs 19) | 100                              | 12                                                                 | ns | ns                                | ns | ns | NA  | Low      |
| Weiser et al.<br>(2019)                                       | Romania &<br>Moldova | Chronic schizophrenia or<br>schizoaffective disorder<br>Use of antipsychotics for >= 2<br>weeks<br>(>= 2 episodes, duration of<br>illness > 6 months, PANSS-P<br>P1, P2, P3, P6 >= 4 and/or<br>PANSS-N >=18 and CGI >= 4) | In- and<br>outpatients                  | Coinitiation<br>(SGA+FGA<br>unspecified,<br>flexible dose<br>unspecified) | 171<br>(83 vs<br>88)                   | 200                              | 16                                                                 | ns | ns                                | ns | ns | ns  | Moderate |
| <b>PUFAS, 14 RCTs, N total=809, N PUFA=432, N placebo=377</b> |                      |                                                                                                                                                                                                                           |                                         |                                                                           |                                        |                                  |                                                                    |    |                                   |    |    |     |          |
| <b>Chronic schizophrenia</b>                                  |                      |                                                                                                                                                                                                                           |                                         |                                                                           |                                        |                                  |                                                                    |    |                                   |    |    |     |          |

|                           |                |                                                                                                                                                                                                                                                                    |             |                                                |                   |                      |    |    |    |    |    |    |          |
|---------------------------|----------------|--------------------------------------------------------------------------------------------------------------------------------------------------------------------------------------------------------------------------------------------------------------------|-------------|------------------------------------------------|-------------------|----------------------|----|----|----|----|----|----|----------|
| Fenton et al., (2001)     | USA            | Chronic schizophrenia<br>Presence of significant residual symptoms (defined as either one or more positive and/or negative symptom scores > 4 or PANSS total scores greater than 45 with a score of three or greater on at least three positive or negative items) | Outpatients | Augmentation (FGA or SGA, fixed dose)          | 75 (37 vs 38)     | EPA 3000             | 16 | ns | ns | ns | ns | ns | Moderate |
| Peet et al., 2001 (UK)    | United Kingdom | Chronic schizophrenia<br>PANSS score >40                                                                                                                                                                                                                           | Outpatients | Augmentation (FGA or SGA, fixed dose)          | 29 (15 EPA vs 14) | EPA 2000             | 12 | +  | NA | NA | +  | NA | Moderate |
| Peet et al., 2001 (India) | India          | Chronic schizophrenia<br>PANSS score >40                                                                                                                                                                                                                           | Outpatients | Augmentation (FGA or SGA, fixed dose)          | 30 (16 DHA vs 14) | DHA 2000             | 12 | ns | NA | NA | ns | NA | High     |
| Emsley et al., 2002       | South Africa   | Chronic schizophrenia<br>PANSS score >50                                                                                                                                                                                                                           | Outpatients | Augmentation (FGA or SGA, fixed dose)          | 39 (19 vs 20)     | EPA 3000             | 12 | ns | ns | +  | +  | NA | Low      |
| Peet et al., 2002         | United Kingdom | Chronic schizophrenia<br>PANSS score >50<br>Illness duration <20 years                                                                                                                                                                                             | Outpatients | Augmentation (FGA or SGA, fixed dose)          | 57 (29 vs 28)     | EPA 1000             | 12 | ns | ns | ns | ns | NA | Low      |
|                           |                |                                                                                                                                                                                                                                                                    |             |                                                | 52 (24 vs 28)     | EPA 2000             | 12 | ns | ns | ns | ns | NA | Low      |
|                           |                |                                                                                                                                                                                                                                                                    |             |                                                | 53 (25 vs 28)     | EPA 4000             | 12 | ns | ns | ns | ns | NA | Low      |
| Emsley et al., 2006       | South Africa   | Chronic schizophrenia with tardive dyskinesia                                                                                                                                                                                                                      | Outpatients | Augmentation (FGA, fixed doses)                | 77 (39 vs 38)     | EPA 2000             | 12 | NA | NA | NA | ns | NA | Low      |
| Bošković et al., 2016     | Slovenia       | Chronic schizophrenia (illness duration ≥3 years)                                                                                                                                                                                                                  | Outpatients | Augmentation (Haloperidol, flexible dose)      | 20 (9 vs 11)      | EPA 396/<br>DHA 264  | 16 | ns | ns | ns | ns | NA | High     |
| <b>Acute phase</b>        |                |                                                                                                                                                                                                                                                                    |             |                                                |                   |                      |    |    |    |    |    |    |          |
| Pawelczyk et al., 2016    | Poland         | First episode                                                                                                                                                                                                                                                      | Inpatients  | Coinitiation (sulpiride or SGA, flexible dose) | 71 (36 vs 35)     | EPA 1320/<br>DHA 880 | 26 | ns | ns | +  | +  | NA | Low      |

|                                             |           |                                                                                                                                                                                                                                                          |                                       |                                                                    |                     |                   |           |                     |           |                        |                     |           |            |
|---------------------------------------------|-----------|----------------------------------------------------------------------------------------------------------------------------------------------------------------------------------------------------------------------------------------------------------|---------------------------------------|--------------------------------------------------------------------|---------------------|-------------------|-----------|---------------------|-----------|------------------------|---------------------|-----------|------------|
| Berger et al., 2007                         | Australia | First episode<br>At least one psychotic symptom daily for more than 1 week (delusions, hallucinations, disorder of thinking and/or speech other than simple acceleration or retardation, and disorganized, bizarre, or markedly inappropriate behavior). | In and outpatients                    | Coinitiation (SGA, flexible dose)                                  | 69 (35 vs 34)       | EPA2000           | 12        | ns                  | ns        | ns                     | ns                  | NA        | Moderate   |
| Robinson et al., 2019, Szeszko et al., 2021 | USA       | Early schizophrenia (n=46) or bipolar I with psychosis (n=4); (treated <2years)<br>Current BPRS positive symptoms rated ≥4 (moderate) on one or more of: conceptual disorganization, grandiosity, hallucinatory behavior, unusual thought content        | Inpatients                            | Coinitiation (risperidone, flexible dose)                          | 24 (12 vs 12)       | EPA 740/ DHA 400  | 16        | ns                  | ns        | + (depression-anxiety) | ns                  | +/ns      | Moderate   |
| Bentsen et al., 2013                        | Norway    | <b>Chronic schizophrenia</b>                                                                                                                                                                                                                             | <b>Inpatients</b>                     | <b>Coinitiation (FGA or SGA&lt;3 weeks, flexible doses)</b>        | <b>74(36 vs 38)</b> | <b>EPA 2000</b>   | <b>16</b> | <b>+ (low PUFA)</b> | <b>ns</b> | <b>ns</b>              | <b>+ (low PUFA)</b> | <b>NA</b> | <b>Low</b> |
| Manteghiy et al., 2008                      | Iran      | Chronic schizophrenia                                                                                                                                                                                                                                    | Inpatients                            | Coinitiation (Risperidone flexible dose)                           | 85 (42 vs 43)       | EPA 1080/ DHA 720 | 6         | ns                  | ns        | ns                     | ns                  | NA        | Moderate   |
| Jamilian et al., 2014                       | Iran      | Chronic schizophrenia PANSS score >60                                                                                                                                                                                                                    | Inpatients/O utpatients (Unspecified) | Coinitiation (olanzapine, risperidone or clozapine, flexible dose) | 60 (30 vs 30)       | EPA 1000          | 8         | ns                  | ns        | +                      | +                   | NA        | High       |
| Qiao et al., 2018                           | China     | Chronic schizophrenia in the first two weeks after hospitalization PANSS score >50                                                                                                                                                                       | Inpatients                            | Coinitiation (FGA or SGA, flexible dose)                           | 50 (28 vs 22)       | EPA 540/ DHA 360  | 12        | NA                  | NA        | NA                     | ns                  | NA        | High       |

| <b>Estrogens. Nine RCTs (one with three arms), N total=677. N estrogens=383. N placebo=294</b> |             |                                                                                                                                                                              |                        |                                                                                   |                      |                                                                                                              |   |    |    |   |    |     |          |
|------------------------------------------------------------------------------------------------|-------------|------------------------------------------------------------------------------------------------------------------------------------------------------------------------------|------------------------|-----------------------------------------------------------------------------------|----------------------|--------------------------------------------------------------------------------------------------------------|---|----|----|---|----|-----|----------|
| <b>Chronic schizophrenia</b>                                                                   |             |                                                                                                                                                                              |                        |                                                                                   |                      |                                                                                                              |   |    |    |   |    |     |          |
| Ko et al. 2006                                                                                 | South Korea | -Acute or stabilized<br>-Chronic schizophrenia,<br>schizoaffective or<br>schizophreniform disorder<br>Childbearing aged women<br>(mean aged 33 years for<br>estrogen group)  | Inpatients             | Augmentation<br>(SGA, fixed<br>doses)                                             | 28 (14<br>vs 14)     | 0.625 mg<br>(conjugate<br>d estrogen<br>with<br>2.5 mg of<br>medroxyprogestero<br>ne<br>acetate)<br>(per os) | 8 | NA | +  | + | NA | +/- | Low      |
| Kulkarni et al. 2008                                                                           | Australia   | -Acute or stabilized phase<br>-Chronic schizophrenia,<br>schizoaffective or<br>schizophreniform disorder<br>Childbearing aged women<br>(mean age 33 years in both<br>groups) | In- and<br>outpatients | Augmentation<br>(FGA or SGA,<br>fixed doses<br>unspecified)                       | 87 (51<br>vs 36)     | 0.1 mg<br>Transder<br>mal<br>Estradiol                                                                       | 4 | +  | ns | + | +  | NA  | Low      |
| Kulkarni et al. 2011                                                                           | Australia   | - Middle-aged men<br>-Chronic schizophrenia,<br>schizoaffective disorder and<br>8 patients with first episode<br>-PANSS>60                                                   | In- and<br>outpatients | Augmentation,<br>SGA (fixed<br>doses<br>unspecified)<br>+ 7 on mood<br>stabilizer | 51 (25<br>vs 26)     | 2 mg<br>Estradiol<br>valerate<br>(per os)                                                                    | 2 | ns | ns | + | ns | NA  | Moderate |
| Ghafari et al. 2013                                                                            | Iran        | Chronic schizophrenia<br>(institutionalized)<br>Childbearing aged women<br>(mean age 34 years in both<br>groups)                                                             | Inpatients             | Augmentation<br>(FGA or SGA,<br>fixed/flexible<br>dose<br>unspecified)            | 32 (16<br>vs 16)     | 0.625 mg<br>Conjugate<br>d<br>Estrogens<br>(per os)                                                          | 4 | +  | +  | + | +  | NA  | High     |
| Kulkarni et al. 2014                                                                           | Australia   | Chronic schizophrenia or<br>schizoaffective disorder<br>(PANSS>60)<br>Childbearing aged women<br>Aged 18-45 (mean 35 years)                                                  | In- and<br>outpatients | Augmentation<br>(FGA or SGA,<br>fixed doses)                                      | 121(5<br>9 vs<br>62) | 0.1 mg<br>Transder<br>mal<br>Estradiol                                                                       | 8 | +  | ns | + | +  | ns  | Low      |

|                                                                                                                        |                        |                                                                                                                                                                       |                       |                                                               |                      |                                                 |    |    |    |    |    |    |          |
|------------------------------------------------------------------------------------------------------------------------|------------------------|-----------------------------------------------------------------------------------------------------------------------------------------------------------------------|-----------------------|---------------------------------------------------------------|----------------------|-------------------------------------------------|----|----|----|----|----|----|----------|
|                                                                                                                        |                        |                                                                                                                                                                       |                       |                                                               | 124<br>(62 vs<br>62) | 0.2 mg<br>Transder<br>mal<br>Estradiol          | 8  | +  | ns | +  | +  | ns | Low      |
| Weiser et al.<br>2019                                                                                                  | Republic of<br>Moldova | Premenopausal women<br>aged 19-46 years (median<br>age, 38 years; interquartile<br>range, 34-42 years)                                                                | In-and<br>outpatients | Augmentation<br>(FGA or SGA,<br>fixed doses)                  | 188<br>(95 vs<br>93) | 0.2 mg<br>Transder<br>mal<br>Estradiol          | 8  | +  | +  | +  | +  | ns | Low      |
| <b>Acute phase</b>                                                                                                     |                        |                                                                                                                                                                       |                       |                                                               |                      |                                                 |    |    |    |    |    |    |          |
| Kulkarni et al,<br>2001                                                                                                | Australia              | Chronic middle-aged<br>schizophrenia or<br>schizoaffective or<br>schizophreniform disorder<br>Childbearing aged women<br>(mean age 33 years in the<br>estrogen group) | Not specified         | Coinitiation<br>(risperidone,<br>flexible dose)               | 24 (12<br>vs 12)     | 0.05 mg<br>Transderm<br>al<br>Estradiol         | 4  | ns | ns | ns | ns | NA | Moderate |
|                                                                                                                        |                        |                                                                                                                                                                       |                       |                                                               | 24 (12<br>vs 12)     | 0.1 mg<br>Transderm<br>al<br>Estradiol          | 4  | +  | +  | +  | +  | NA | Moderate |
| Akhondzadeh<br>et al. 2003                                                                                             | Iran                   | Untreated Chronic<br>schizophrenia (PANSS>60)<br>Childbearing aged women<br>(mean age 32 years in the<br>estrogen group)                                              | Inpatients            | Coinitiation<br>(haloperidol 15<br>mg, fixed dose)            | 32 (16<br>vs 16)     | 0.05 mg<br>Ethynyl<br>Estradiol<br>(per os)     | 8  | +  | +  | +  | +  | NA | Low      |
| Louza et al.<br>2004                                                                                                   | Brazil                 | Childbearing aged women<br>with schizophrenia in active<br>phase (mean age 34 years in<br>the estrogen group)                                                         | Not specified         | Augmentation<br>(haloperidol,<br>fixed doses)                 | 40 (21<br>vs 19)     | 0.625 mg<br>conjugate<br>d estrogen<br>(per os) | 4  | ns | ns | ns | ns | NA | Moderate |
|                                                                                                                        |                        |                                                                                                                                                                       |                       |                                                               |                      |                                                 |    |    |    |    |    |    |          |
| <b>Selective estrogen receptor modulator (SERM) (Raloxifene). 9 RCTs. N total=552. N raloxifene=275. N placebo=277</b> |                        |                                                                                                                                                                       |                       |                                                               |                      |                                                 |    |    |    |    |    |    |          |
| <b>Chronic schizophrenia</b>                                                                                           |                        |                                                                                                                                                                       |                       |                                                               |                      |                                                 |    |    |    |    |    |    |          |
| Kulkarni et al<br>2010                                                                                                 | Australia              | SZ, schizoaffective or<br>schizophreniform disorder<br>(PANSS>60) Peri or<br>postmenopausal women                                                                     | Not specified         | Augmentation<br>FGA or SGA<br>(flexible doses<br>unspecified) | 26 (13<br>vs 13)     | 120                                             | 12 | +  | ns | +  | ns | NA | Moderate |

|                                               |                                 |                                                                                                                                                                                                                                       |                                 |                                                       |                                |            |                                 |          |          |    |    |          |          |
|-----------------------------------------------|---------------------------------|---------------------------------------------------------------------------------------------------------------------------------------------------------------------------------------------------------------------------------------|---------------------------------|-------------------------------------------------------|--------------------------------|------------|---------------------------------|----------|----------|----|----|----------|----------|
| Usall et al. 2011                             | Spain                           | SZ Postmenopausal women with at least one item score > 4 on the PANSS negative factor<br>Stable dose of antipsychotics in the month before inclusion                                                                                  | In- (non acute) and outpatients | Augmentation (FGA or SGA, fixed doses)                | 32 (15 vs 17)                  | 60         | 12                              | +        | +        | +  | +  | NA       | Low      |
| Weickert et al, 2015                          | Australia                       | Chronic SZ or schizoaffective disorders (both sexes) (mean PANSS ~60+/-18)                                                                                                                                                            | Outpatients                     | Augmentation (FGA or SGA flexible doses unspecified)  | 79 (40 vs 39)                  | 120        | 6 (parallel)<br>13 (cross-over) | ns       | ns       | ns | NA | + / ns   | Low      |
| Kulkarni et al. 2016<br>Gurvich et al. 2019   | Australia                       | SZ or schizoaffective peri or post-menopausal middle-aged Women<br>PANSS > 60<br>Stable dose of antipsychotics for at least 4 months                                                                                                  | In and outpatients              | Augmentation (FGA or SGA, fixed doses)                | 56 (26 vs 30)                  | 120<br>120 | 12<br>12                        | ns<br>NA | ns<br>NA | +  | +  | ns<br>ns | Low      |
| Usall et al. 2016<br>Huerta-Ramos et al. 2020 | Spain                           | SZ Post-menopausal middle-aged women<br>Chronic SZ with significant negative symptoms (at least one negative symptom score > 4 on the PANSS)                                                                                          | In- and outpatients             | Augmentation (FGA or SGA, fixed doses)                | 57 (27 vs 30)<br>58 (31 vs 27) | 60<br>60   | 24<br>24                        | ns<br>NA | +        | +  | +  | NA<br>ns | Moderate |
| Weiser et al. 2017                            | Romania and Republic of Moldova | SZ Post-menopausal women<br>CGI score ≥ 4 OR score ≥ 4 on 2 of these PANSS items: delusions, hallucinations, conceptual disorganization, suspicion/persecution OR<br>PANSS negative score ≥ 18<br>Antipsychotics for at least 2 weeks | In- and outpatients (13/187)    | Augmentation (FGA or SGA, flexible doses unspecified) | 174 (90 vs 84)                 | 120        | 16                              | -        | -        | -  | -  | ns       | Low      |
| Vahdani et al. 2020                           | Iran                            | SZ<br>Both genders                                                                                                                                                                                                                    | Not specified                   | Augmentation (FGA or SGA, fixed doses)                | 40 (20 vs 20)                  | 60         | 6                               | NA       | NA       | NA | NA | + / ns   | Low      |
| Acute phase                                   |                                 |                                                                                                                                                                                                                                       |                                 |                                                       |                                |            |                                 |          |          |    |    |          |          |

|                                                                      |                                                   |                                                                                                                                                                                                                           |                     |                                                                  |                      |                           |          |           |          |          |          |           |            |
|----------------------------------------------------------------------|---------------------------------------------------|---------------------------------------------------------------------------------------------------------------------------------------------------------------------------------------------------------------------------|---------------------|------------------------------------------------------------------|----------------------|---------------------------|----------|-----------|----------|----------|----------|-----------|------------|
| Kianimehr et al. 2014                                                | Iran                                              | SZ Post-menopausal women<br>Duration of illness > 2 years<br>PANSS > 60                                                                                                                                                   | Inpatients          | Coinitiation<br>(Risperidone 6 mg/day, fixed dose)               | 46 (23 vs 23)        | 120                       | 8        | +         | ns       | ns       | ns       | NA        | Moderate   |
| Khodaie-Ardakani et al. 2015                                         | Iran                                              | <b>SZ Men aged between 18-55</b><br>Duration of illness > 2 years<br>PANSS > 60<br>Patients with depression excluded                                                                                                      | Outpatients         | <b>Coinitiation</b><br><b>(Risperidone 6 mg/day, fixed dose)</b> | <b>42 (21 vs 21)</b> | <b>120</b>                | <b>8</b> | <b>ns</b> | <b>+</b> | <b>+</b> | <b>+</b> | <b>NA</b> | <b>Low</b> |
| <b>Aspirin. Four RCTs. N total=424. N aspirin=221. N placebo=203</b> |                                                   |                                                                                                                                                                                                                           |                     |                                                                  |                      |                           |          |           |          |          |          |           |            |
| <b>Mix early-phase + chronic schizophrenia</b>                       |                                                   |                                                                                                                                                                                                                           |                     |                                                                  |                      |                           |          |           |          |          |          |           |            |
| Laan et al. 2010                                                     | Netherlands                                       | Schizophrenia or schizoaffective disorder <5 years (+26 patients <10 years), PANSS>60 with score 4 on 2 items, tested for 2 weeks observance before randomization                                                         | In and outpatients  | Coinitiation<br>(FGA+SGA, fixed dose)                            | 58 (27 vs 31)        | 1000 (+pantoprazole 40mg) | 12       | +         | ns       | ns       | +        | ns        | Moderate   |
| <b>Chronic schizophrenia</b>                                         |                                                   |                                                                                                                                                                                                                           |                     |                                                                  |                      |                           |          |           |          |          |          |           |            |
| Weiser et al. 2021                                                   | Romania (18 sites)/Republic of Moldova (one site) | Chronic schizophrenia or schizoaffective disorder with at least 2 psychotic episodes or continuous illness≥6months<br>Score≥4 on at least one of the PANSS positive or disorganized items or ≥18 on PANSS negative factor | In- and outpatients | Augmentation<br>(FGA + SGA for at least 2 weeks, flexible dose)  | 179 (91 vs 88)       | 1000 (+pantoprazole 40mg) | 16       | ns        | ns       | ns       | ns       | ns        | Moderate   |
| Weiser et al. 2021                                                   | Romania                                           | Chronic schizophrenia or schizoaffective disorder with at least 2 psychotic episodes or continuous illness≥6months<br>Score≥4 on two or more of the PANSS positive or disorganized items<br>CRP>1mg/L                     | In- and outpatients | Augmentation<br>(FGA + SGA for at least 2 weeks, flexible dose)  | 127 (63 vs 64)       | 1000 (+pantoprazole 40mg) | 16       | ns        | ns       | ns       | ns       | ns        | Moderate   |
| <b>Acute phase</b>                                                   |                                                   |                                                                                                                                                                                                                           |                     |                                                                  |                      |                           |          |           |          |          |          |           |            |

|                                                                          |         |                                         |                                   |                                                                  |                  |                        |    |    |    |    |    |    |          |
|--------------------------------------------------------------------------|---------|-----------------------------------------|-----------------------------------|------------------------------------------------------------------|------------------|------------------------|----|----|----|----|----|----|----------|
| Attari et al. 2017                                                       | Iran    | Chronic schizophrenia (>2years)         | In- and outpatients (unspecified) | Coinitiation (FGA + SGA, fixed dose)                             | 40 (20 vs 20)    | 325 (+omeprazole 20mg) | 6  | +  | +  | +  | +  | NA | High     |
|                                                                          |         |                                         |                                   |                                                                  | 40 (20 vs 20)    | 500 (+omeprazole 20mg) | 6  | +  | +  | +  | +  | NA | High     |
| <b>Celecoxib, Five RCTs. N total=440, N celecoxib=222, N placebo=218</b> |         |                                         |                                   |                                                                  |                  |                        |    |    |    |    |    |    |          |
| <b>Chronic schizophrenia or early/chronic mix</b>                        |         |                                         |                                   |                                                                  |                  |                        |    |    |    |    |    |    |          |
| Rapaport et al. (2005)                                                   | USA     | Chronic schizophrenia GAF<60            | Outpatients                       | Augmentation (Olanzapine or risperidone, fixed dose unspecified) | 35 (18 vs 17)    | 400                    | 8  | ns | ns | ns | ns | NA | Moderate |
| <b>Acute phase</b>                                                       |         |                                         |                                   |                                                                  |                  |                        |    |    |    |    |    |    |          |
| Müller et al. (2010)                                                     | Germany | First episode schizophrenia             | Inpatients                        | Coinitiation (Amisulpride, flexible dose)                        | 37 (17 vs 20)    | 400                    | 6  | ns | +  | ns | ns | NA | Moderate |
| Müller et al. (2002)                                                     | Germany | First episode and chronic schizophrenia | Inpatients                        | Coinitiation (Risperidone, flexible dose)                        | 43 (21 vs 22)    | 400                    | 5  | ns | ns | ns | +  | NA | Moderate |
| Rappard and Müller (2004)                                                | USA     | Chronic schizophrenia PANSS > 60        | Inpatients                        | Coinitiation (Risperidone, flexible dose)                        | 270 (138 vs 132) | 400                    | 11 | ns | ns | ns | ns | NA | High     |
| Akhondzadeh et al. (2007)                                                | Iran    | Chronic schizophrenia PANSS > 60        | Inpatients                        | Coinitiation (Risperidone, fixed dose 6mg/j)                     | 55 (28 vs 27)    | 400                    | 8  | +  | ns | +  | +  | NA | Low      |

NA not available. Ns non-significant ( $p \geq 0.05$ ). FGA first generation antipsychotics. SGA second-generation antipsychotics. PANSS Positive and Negative Syndrome Scale for Schizophrenia. RCT randomized controlled trials



## Supplementary material 6. Detailed risk of bias analysis of the 63 randomized controlled trials (RCTs).

| Study ID                    | Coinitiation or augmentation (antipsychotic treatment, flexible/fixed doses)              | 1.1 Focused question | 1.2 Randomized assignment | 1.3 Adequate concealment | 1.4 Blindness | 1.5 Similar groups at baseline | 1.6 Only Treatment under investigation | 1.7 Valid outcomes | 1.8 Percentage of dropouts | 1.9 Intention-to-treat analysis | 1.10 All sites comparable | Risk of bias |
|-----------------------------|-------------------------------------------------------------------------------------------|----------------------|---------------------------|--------------------------|---------------|--------------------------------|----------------------------------------|--------------------|----------------------------|---------------------------------|---------------------------|--------------|
| <b>NAC</b>                  |                                                                                           |                      |                           |                          |               |                                |                                        |                    |                            |                                 |                           |              |
| Conus et al. (2018)         | Augmentation (FGA + SGA, flexible dose)                                                   | Y                    | Y                         | Y                        | Y             | Y                              | Y                                      | Y                  | 3.2%                       | Y                               | DNA                       | Low          |
| Breier et al. (2018)        | Augmentation (FGA + SGA, flexible dose)                                                   | Y                    | Y                         | Y                        | Y             | Y                              | U                                      | Y                  | 46.7%                      | Y                               | DNA                       | Moderate     |
| Davis et al. (2014)         | Augmentation (FGA + SGA, unspecified flexible dose)                                       | Y                    | Y                         | U                        | Y             | U                              | U                                      | Y                  | 34.6%                      | Y                               | DNA                       | Moderate     |
| Berk et al. (2008)          | Augmentation (FGA + SGA, flexible dose)                                                   | Y                    | Y                         | Y                        | Y             | Y                              | U                                      | Y                  | 40.0%                      | Y                               | DNA                       | Moderate     |
| Rapado-Castro et al. (2017) | Augmentation (FGA + SGA, flexible dose)                                                   | Y                    | Y                         | Y                        | Y             | Y                              | Y                                      | Y                  | U                          | Y                               | U                         | Moderate     |
| Sepehrmanesh et al. (2018)  | Augmentation (FGA + SGA + anti-cholinergic agents, fixed dose)                            | Y                    | Y                         | Y                        | Y             | N                              | Y                                      | Y                  | 6.0%                       | Y                               | DNA                       | Low          |
| Zhang et al. (2015)         | Coinitiation (risperidone)                                                                | Y                    | Y                         | U                        | U             | U                              | U                                      | U                  | U                          | U                               | DNA                       | High         |
| Farokhnia et al. (2013)     | Coinitiation (risperidone flexible dose)                                                  | Y                    | Y                         | Y                        | Y             | Y                              | Y                                      | Y                  | 8.7%                       | Y                               | DNA                       | Low          |
| <b>Sarcosine</b>            |                                                                                           |                      |                           |                          |               |                                |                                        |                    |                            |                                 |                           |              |
| Tsai et al. 2004            | Augmentation (FGA + SGA, fixed dose, stable at least for 3 months, one patient untreated) | Y                    | Y                         | Y                        | Y             | N                              | Y                                      | Y                  | 5.2%                       | N                               | DNA                       | High         |
| Lane et al. 2010            | Augmentation (SGA, fixed dose, stable at least for 3 months)                              | Y                    | Y                         | Y                        | Y             | N                              | Y                                      | Y                  | 12.5%                      | N                               | DNA                       | Moderate     |

|                                |                                                                                        |   |   |   |   |   |   |   |            |     |     |                 |
|--------------------------------|----------------------------------------------------------------------------------------|---|---|---|---|---|---|---|------------|-----|-----|-----------------|
| Lin et al. 2015                | Augmentation (SGA, fixed dose, stable at least for 2 months)                           | Y | Y | Y | Y | Y | Y | Y | 23.8%      | N   | DNA | Moderate        |
| Strzelecki et al. 2015         | Augmentation (FGA + SGA excluding clozapine, fixed dose, stable at least for 3 months) | Y | U | Y | Y | Y | Y | Y | U          | U   | DNA | Moderate        |
| Lane et al. 2006               | Augmentation (Clozapine, fixed dose, stable for at least 3 months)                     | Y | N | Y | Y | Y | Y | Y | 0%         | DNA | DNA | High            |
| Lane et al. 2005               | Coinitiation (Risperidone, flexible dose)                                              | Y | Y | Y | Y | Y | Y | Y | 13.7%      | Y   | DNA | Moderate        |
| <b>Minocycline</b>             |                                                                                        |   |   |   |   |   |   |   |            |     |     |                 |
| Chaudhry et al. 2012           | Augmentation (SGA+FGA unspecified, flexible dose unspecified)                          | Y | Y | Y | Y | Y | Y | Y | 33.3 %     | Y   | DNA | Moderate        |
| Liu et al. (2014)              | <b>Augmentation (Risperidone, fixed dose)</b>                                          | Y | Y | Y | Y | N | Y | Y | 31.2 %     | Y   | Y   | <b>Moderate</b> |
| Deakin et al. (2018)           | <b>Augmentation (FGA and SGA, fixed dose)</b>                                          | Y | Y | Y | Y | Y | Y | Y | 36.7 %     | Y   | DNA | <b>Low</b>      |
| Khodaie-Ardakani et al. (2014) | Augmentation (Risperidone, flexible dose)                                              | Y | Y | Y | Y | Y | Y | Y | 5%         | Y   | DNA | Low             |
| Kelly et al. (2015)            | <b>Augmentation (clozapine, fixed dose)</b>                                            | Y | Y | Y | Y | Y | Y | Y | 4%         | Y   | U   | <b>Low</b>      |
| Levkovitz et al. (2010)        | Coinitiation (SGA including clozapine, flexible dose)                                  | Y | Y | U | U | Y | Y | Y | 70%        | Y   | DNA | High            |
| Zhang et al. (2018) (3 arms)   | Coinitiation (Risperidone,                                                             | Y | Y | Y | Y | Y | Y | Y | 22%<br>26% | Y   | DNA | Low             |

|                                             |                                                               |   |   |   |   |   |   |   |        |   |     |          |
|---------------------------------------------|---------------------------------------------------------------|---|---|---|---|---|---|---|--------|---|-----|----------|
|                                             | flexible dose 3 to 6 mg)                                      |   |   |   |   |   |   |   |        |   |     |          |
| <b>Weiser M. et al. (2019)</b>              | Augmentation (SGA+FGA unspecified, flexible dose unspecified) | Y | Y | Y | Y | Y | Y | Y | 14.5 % | Y | U   | Moderate |
| <b>PUFAS</b>                                |                                                               |   |   |   |   |   |   |   |        |   |     |          |
| Fenton et al., 2001                         | Augmentation (FGA or SGA, fixed dose)                         | Y | U | Y | Y | Y | Y | Y | 16.7%  | Y | DNA | Moderate |
| Peet et al., 2001 (UK)                      | Augmentation (FGA or SGA, fixed dose)                         | Y | U | U | Y | U | Y | Y | 18.2%  | N | DNA | Moderate |
| Peet et al., 2001 (India)                   | Augmentation (FGA or SGA, fixed dose)                         | Y | U | U | Y | U | N | Y | 13.3%  | N | DNA | High     |
| <b>Emsley et al., 2002</b>                  | <b>Augmentation (FGA or SGA, fixed dose)</b>                  | Y | Y | Y | Y | Y | Y | Y | 2.5%   | Y | DNA | Low      |
| <b>Peet et al., 2002 (3 arms)</b>           | <b>Augmentation (FGA or SGA, fixed dose)</b>                  | Y | Y | Y | Y | Y | Y | Y | 7.8%   | Y | U   | Low      |
| <b>Emsley et al., 2006</b>                  | <b>Augmentation (FGA, fixed doses)</b>                        | Y | Y | Y | Y | Y | Y | Y | 8.3%   | Y | DNA | Low      |
| Bošković et al., 2016                       | Augmentation (Haloperidol, flexible dose)                     | Y | U | Y | Y | Y | Y | Y | 14.7%  | U | DNA | High     |
| <b>Pawelczyk et al., 2016</b>               | <b>Coinitiation (sulpiride or SGA, flexible dose)</b>         | Y | Y | Y | Y | Y | Y | Y | 8.4%   | Y | DNA | Low      |
| Berger et al., 2007                         | Coinitiation (SGA, flexible dose)                             | Y | Y | Y | Y | Y | N | Y | 13.8%  | Y | DNA | Moderate |
| Robinson et al., 2019, Szeszko et al., 2021 | Coinitiation (risperidone, flexible dose)                     | Y | Y | Y | Y | Y | Y | Y | 30%    | Y | DNA | Moderate |
| <b>Bentsen et al., 2013</b>                 | <b>Coinitiation (FGA or SGA&lt;3 weeks, flexible doses)</b>   | Y | Y | Y | Y | U | Y | Y | 25.7%  | Y | U   | Low      |
| Manteghiy et al., 2008                      | Coinitiation (Risperidone flexible dose)                      | Y | Y | U | U | Y | U | Y | 24.7%  | N | DNA | Moderate |

|                               |                                                                    |   |   |   |   |   |   |   |       |   |     |          |
|-------------------------------|--------------------------------------------------------------------|---|---|---|---|---|---|---|-------|---|-----|----------|
| Jamilian et al., 2014         | Coinitiation (olanzapine, risperidone or clozapine, flexible dose) | Y | U | U | U | U | N | Y | U     | N | DNA | High     |
| Qiao et al., 2018             | Coinitiation (FGA or SGA, flexible dose)                           | Y | U | U | U | Y | N | Y | 48%   | N | DNA | High     |
| <b>Estrogens</b>              |                                                                    |   |   |   |   |   |   |   |       |   |     |          |
| Ko et al. 2006                | Augmentation (SGA, fixed doses)                                    | Y | Y | Y | Y | Y | Y | Y | 0     | Y | DNA | Low      |
| Kulkarni et al. 2008          | Augmentation (FGA or SGA, fixed doses unspecified)                 | Y | Y | Y | Y | Y | Y | Y | 14.7% | U | DNA | Low      |
| Kulkarni et al. 2011          | Augmentation, SGA (fixed doses unspecified) + 7 on mood stabilizer | Y | Y | U | Y | Y | Y | Y | 3.8%  | U | DNA | Moderate |
| Ghafari et al. 2013           | Augmentation (FGA or SGA, fixed/flexible dose unspecified)         | Y | Y | U | Y | Y | Y | Y | 0     | Y | DNA | High     |
| Kulkarni et al. 2014 (3 arms) | Augmentation (FGA or SGA, fixed doses)                             | Y | Y | Y | Y | Y | Y | Y | 2.5%  | Y | DNA | Low      |
| Weiser et al. 2019            | Augmentation (FGA or SGA, fixed doses)                             | Y | Y | Y | Y | Y | Y | Y | 6%    | Y | DNA | Low      |
| Kulkarni et al, 2001 (3 arms) | Coinitiation (risperidone, flexible dose)                          | Y | Y | Y | Y | Y | Y | Y | 0     | Y | DNA | Moderate |
| Akhondzadeh et al. 2003       | Coinitiation (haloperidol 15 mg, fixed dose)                       | Y | Y | U | Y | Y | Y | Y | 0     | Y | DNA | Low      |
| Louza et al. 2004             | Augmentation (haloperidol, fixed doses)                            | Y | U | U | U | Y | Y | Y | 0     | Y | DNA | Moderate |
| <b>SERM</b>                   |                                                                    |   |   |   |   |   |   |   |       |   |     |          |

|                                               |                                                              |   |   |   |   |   |   |   |                 |   |     |          |
|-----------------------------------------------|--------------------------------------------------------------|---|---|---|---|---|---|---|-----------------|---|-----|----------|
| Kulkarni et al 2010                           | Augmentation FGA or SGA (flexible doses unspecified)         | Y | Y | Y | Y | Y | Y | Y | 0 %             | Y | DNA | Moderate |
| Usall et al. 2011                             | Augmentation (FGA or SGA, fixed doses)                       | Y | Y | Y | Y | Y | Y | Y | 0 %             | Y | DNA | Low      |
| Weickert et al, 2015                          | Augmentation (FGA or SGA flexible doses unspecified)         | Y | Y | Y | Y | Y | Y | Y | 23.6 %          | Y | DNA | Low      |
| Kulkarni et al. 2016<br>Gurvich et al. 2019   | Augmentation (FGA or SGA, fixed doses)                       | Y | Y | Y | Y | Y | Y | Y | 1.8 %<br>U      | Y | DNA | Low      |
| Usall et al. 2016<br>Huerta-Ramos et al. 2020 | Augmentation (FGA or SGA, fixed doses)                       | Y | Y | Y | Y | N | Y | Y | 4.3 %<br>14.7 % | Y | DNA | Moderate |
| Weiser et al. 2017                            | Augmentation (FGA or SGA, flexible doses unspecified)        | Y | Y | Y | Y | Y | Y | Y | 14.5%           | Y | DNA | Low      |
| Vahdani et al. 2020                           | Augmentation (FGA or SGA, fixed doses)                       | Y | Y | Y | Y | Y | Y | Y | 9.1 %           | U | DNA | Low      |
| Kianimehr et al. 2014                         | Coinitiation (Risperidone 6 mg/day, fixed dose)              | Y | Y | U | Y | Y | Y | Y | U               | U | N   | Moderate |
| Khodaie-Ardakani et al. 2015                  | Coinitiation (Risperidone 6 mg/day, fixed dose)              | Y | Y | Y | Y | Y | Y | Y | 8.7 %           | Y | DNA | Low      |
| <b>Aspirin</b>                                |                                                              |   |   |   |   |   |   |   |                 |   |     |          |
| Laan et al. 2010                              | Coinitiation (FGA+SGA, fixed dose)                           | Y | Y | Y | Y | N | Y | Y | 17.1 %          | Y | Y   | Moderate |
| Weiser et al. 2021                            | Augmentation (FGA + SGA for at least 2 weeks, flexible dose) | Y | Y | Y | Y | N | Y | Y | 10.5%           | Y | DNA | Moderate |
| Weiser et al. 2021                            | Augmentation (FGA + SGA for at least 2 weeks, flexible dose) | Y | Y | Y | Y | N | Y | Y | 20.6%           | Y | DNA | Moderate |

|                                  |                                                                  |   |   |   |   |   |   |   |        |   |            |          |
|----------------------------------|------------------------------------------------------------------|---|---|---|---|---|---|---|--------|---|------------|----------|
| <b>Attari et al. (2017)</b>      | Coinitiation (FGA + SGA, fixed dose)                             | Y | Y | Y | Y | Y | U | Y | 0 %    | Y | <b>DNA</b> | High     |
| <b>Celecoxib</b>                 |                                                                  |   |   |   |   |   |   |   |        |   |            |          |
| <b>Rapaport et al. (2005)</b>    | Augmentation (Olanzapine or risperidone, fixed dose unspecified) | Y | Y | Y | Y | N | Y | Y | 8.0 %  | N | <b>DNA</b> | Moderate |
| <b>Müller et al. (2010)</b>      | Coinitiation (Amisulpride, flexible dose)                        | Y | Y | Y | Y | N | Y | Y | 26.0 % | Y | <b>DNA</b> | Moderate |
| <b>Müller et al. (2002)</b>      | Coinitiation (Risperidone, flexible dose)                        | Y | Y | Y | Y | U | Y | Y | 14 %   | Y | <b>DNA</b> | Moderate |
| <b>Rappard and Müller (2004)</b> | Coinitiation (Risperidone, flexible dose)                        | Y | Y | U | Y | U | Y | Y | U      | U | <b>DNA</b> | High     |
| <b>Akhondzadeh et al. (2007)</b> | <b>Coinitiation (Risperidone, fixed dose 6mg/j)</b>              | Y | Y | Y | Y | Y | Y | Y | 8.3 %  | Y | <b>DNA</b> | Low      |

Y: Yes N:No U: Unclear (can't say) DNA does not apply. NA not available. Ns non-significant ( $p \geq 0.05$ ). FGA first generation antipsychotics. SGA second-generation antipsychotics. PANSS Positive and Negative Syndrome Scale for Schizophrenia. RCT randomized controlled trials.

## Supplementary material 7. Results supporting the recommendations: from Level of Evidence to WFSBP-grade recommendations.

| Level of evidence (LoE)                                                                                                                                                                                                                                                                                                                                                                                                                                                                                                                                                                                                                                                                                                                                                                                                                                                                                                                                                                                                                                                                                                                                                                        | WFSBP-grade                                                                                                                                                                                                                                                                                                                                                                                                                                                                                                                                                                                                    |
|------------------------------------------------------------------------------------------------------------------------------------------------------------------------------------------------------------------------------------------------------------------------------------------------------------------------------------------------------------------------------------------------------------------------------------------------------------------------------------------------------------------------------------------------------------------------------------------------------------------------------------------------------------------------------------------------------------------------------------------------------------------------------------------------------------------------------------------------------------------------------------------------------------------------------------------------------------------------------------------------------------------------------------------------------------------------------------------------------------------------------------------------------------------------------------------------|----------------------------------------------------------------------------------------------------------------------------------------------------------------------------------------------------------------------------------------------------------------------------------------------------------------------------------------------------------------------------------------------------------------------------------------------------------------------------------------------------------------------------------------------------------------------------------------------------------------|
| <ul style="list-style-type: none"> <li>• “A”: attributed in case of at least two RCTs with low risk of bias showing effectiveness AND absence of RCT with low risk of bias reporting non-significant effects. In case of conflicting results, the choice between A and B was guided by the presence of meta-analyses with low risk of bias concluding to effectiveness (A) or non-significant results (B). We have opted to use the term “provisional strong” instead of “strong” to qualify our recommendations, considering the limited number of studies available, in particular with low risk of bias. This choice acknowledges the possibility of future changes to these recommendations based on additional randomized controlled trials (RCTs).</li> <li>• B (“limited”): attributed in case of downgrading of LoE A or if at least one RCT with moderate risk of bias reported effectiveness, with absence of RCT with moderate risk of bias reporting non-significant results.</li> <li>• C (“weak”): attributed in case of at least one RCT with high risk of bias reporting effectiveness and absence of RCT with high risk of bias reporting non-significant results.</li> </ul> | <ul style="list-style-type: none"> <li>• WFSBP-grade 1 strong provisional recommendation in favor of treatment (‘A’ LoE and GOOD acceptability),</li> <li>• WFSBP-grade 2 limited provisional recommendation in favor of treatment (‘A’ LoE and MODERATE acceptability OR ‘B’ LoE and GOOD acceptability),</li> <li>• WFSBP-grade 3 weak provisional recommendation (‘A’ LoE and POOR acceptability OR ‘B’ LoE and MODERATE/POOR acceptability OR ‘C’ LoE and GOOD/MODERATE/POOR acceptability).</li> <li>• WFSBP-grade -1/-2/-3 strong/limited/weak provisional recommendations against treatment.</li> </ul> |
| <p>The two or three leading authors assessed independently the risk of bias of each RCT in three modalities (“low/moderate/high risk of bias”). All risks of bias were reviewed for the final validation by FB and GF. The year of publication was taken into account in case of missing information to assess the risk of bias, given that the standards for high-</p>                                                                                                                                                                                                                                                                                                                                                                                                                                                                                                                                                                                                                                                                                                                                                                                                                        |                                                                                                                                                                                                                                                                                                                                                                                                                                                                                                                                                                                                                |

quality methodological reports evolved with time. Similarly, if the RCT was published as a brief report/short communication, this was taken into account if some information was missing and the general quality of the trial was evaluated as recommended in the SIGN methodology[8]. We also took into consideration the potential conflicts of interest reported by the authors to modulate the final risk of bias. The risk of bias was downgraded if the majority of studies concluding to effectiveness also reported potential conflicts of interest.

The separation of levels of evidence and grades of recommendation is needed to allow to define first, second, third, etc. lines of treatment based on the quality of the source data, risk-benefit evaluation and other criteria for grading recommendations[9].

| Summary of the evidence                                                                                                                                                                                                                                                                                                                                                                                                                                                                                                | Dose and duration / Study population                                                                                                                                                                                                                                                                                                                                                                                                                                                                                                                                                                | WFSBP-grade recommendations                                                                                                                                                                                                                                                                                                                                                                                                                                                                                              |
|------------------------------------------------------------------------------------------------------------------------------------------------------------------------------------------------------------------------------------------------------------------------------------------------------------------------------------------------------------------------------------------------------------------------------------------------------------------------------------------------------------------------|-----------------------------------------------------------------------------------------------------------------------------------------------------------------------------------------------------------------------------------------------------------------------------------------------------------------------------------------------------------------------------------------------------------------------------------------------------------------------------------------------------------------------------------------------------------------------------------------------------|--------------------------------------------------------------------------------------------------------------------------------------------------------------------------------------------------------------------------------------------------------------------------------------------------------------------------------------------------------------------------------------------------------------------------------------------------------------------------------------------------------------------------|
| N-acetylcysteine                                                                                                                                                                                                                                                                                                                                                                                                                                                                                                       |                                                                                                                                                                                                                                                                                                                                                                                                                                                                                                                                                                                                     |                                                                                                                                                                                                                                                                                                                                                                                                                                                                                                                          |
| <p>Eight meta-analyses published between 2012 and 2020 explored the effectiveness of adjunctive NAC in schizophrenia [11–18]. Four were rated as high quality [12–14,16], including up to seven RCTs [13,16]. No additional RCT was retrieved from the databases searches. The present recommendations are therefore based on seven RCTs published in eight papers [19–26]. Sample sizes ranged from 17 to 139 patients. These last four meta-analyses concluded NAC was effective in improving negative symptoms.</p> | <p>The NAC dose ranged from 600 to 3,600mg/day for 8 to 52 weeks. Four RCTs tested adjunctive NAC at 600 to 2000mg vs. placebo during 8 to 12 weeks [22,23,25,26]. Three further RCTs tested adjunctive NAC at 1200 to 3600mg vs. placebo during 24 to 52 weeks [19–21,24]. Three RCTs explored the effectiveness of NAC augmentation in patients with chronic schizophrenia [19,23–25], three in patients with early-phase psychosis [20,21,26] and one in a mixed population of early-phase and chronic patients with psychotic disorder [22]. Two RCTs explored the effectiveness of NAC co-</p> | <p>Due to its good acceptability and most of the evidence ranging between A and B levels of evidence (LoE), adjunctive NAC at 1,200 to 3,600mg/day for at least more than 12 weeks is provisionally recommended to improve negative symptoms and general psychopathology in schizophrenia (WFSBP-grade 1), with currently better evidence for chronic schizophrenia. Additionally, NAC augmentation may also improve positive symptoms and cognition in chronic schizophrenia with limited evidence (WFSBP-grade 2).</p> |



|                                                                                                                                                                                                                                                                                                                                                                                                                                                                                                                                                                                                                                                                                                            |                                                                                                                                                                                                                                                                                                                                         |                                                                                                                                                                                                                                                                                                                                                                                                                                                                                                                                                      |
|------------------------------------------------------------------------------------------------------------------------------------------------------------------------------------------------------------------------------------------------------------------------------------------------------------------------------------------------------------------------------------------------------------------------------------------------------------------------------------------------------------------------------------------------------------------------------------------------------------------------------------------------------------------------------------------------------------|-----------------------------------------------------------------------------------------------------------------------------------------------------------------------------------------------------------------------------------------------------------------------------------------------------------------------------------------|------------------------------------------------------------------------------------------------------------------------------------------------------------------------------------------------------------------------------------------------------------------------------------------------------------------------------------------------------------------------------------------------------------------------------------------------------------------------------------------------------------------------------------------------------|
|                                                                                                                                                                                                                                                                                                                                                                                                                                                                                                                                                                                                                                                                                                            | initiation in addition to risperidone in the acute phase first-episode schizophrenia[26] and one in patients with acute phase chronic schizophrenia [23].                                                                                                                                                                               |                                                                                                                                                                                                                                                                                                                                                                                                                                                                                                                                                      |
| Sarcosine                                                                                                                                                                                                                                                                                                                                                                                                                                                                                                                                                                                                                                                                                                  |                                                                                                                                                                                                                                                                                                                                         |                                                                                                                                                                                                                                                                                                                                                                                                                                                                                                                                                      |
| Five meta-analyses [27–31] (including three to six RCTs) explored the effectiveness of adjunctive sarcosine in schizophrenia. All were considered of moderate quality, and all suggested the effectiveness of sarcosine on negative symptoms in non-resistant schizophrenia (i.e. added to non-clozapine antipsychotics), but not in resistant schizophrenia (i.e. added to clozapine). The literature search retrieved no additional RCT, and six RCTs with moderate or high risk of bias were included in the present recommendations [5,32–36]. The sample sizes ranged from 20 to 50 participants. The risk of bias due to potential conflicts of interest was considered as high, as all but one RCTs | The sarcosine dose of 2g/day was used in all RCTs, for six to 24 weeks.<br>All RCTs were carried out in chronic schizophrenia and two of them in patients with predominant negative symptoms[5] or with primary deficit syndrome[33]. Four RCTs included inpatients[32–35], one outpatients[5] and one a mix of in and outpatients[36]. | Sarcosine is an amino-acid with excellent acceptability. 2g/day sarcosine augmentation for at least 12-24 weeks may improve negative symptoms (WFSBP-grade 2) in non-resistant schizophrenia but not positive symptoms, general psychopathology or cognition (WFSBP-grade -3).<br>Sarcosine 2g/day co-initiation with antipsychotics in the acute phase of chronic schizophrenia may improve negative symptoms and general psychopathology (WFSBP-grade 2).<br>Sarcosine may not be effective in treatment-resistant schizophrenia (WFSBP-grade -2). |

|                                                                                                                                                                                                                                                                                                                                                                                                                                                                                                                                               |                                                                                                                                                                                                                                                                                                                                                                                                                                                         |                                                                                                                                                                                                                                                                                                                                                                                                                                                                                                                                                                                                                                                                                                                                                                                                                                                                                                                                                                                                                                                         |
|-----------------------------------------------------------------------------------------------------------------------------------------------------------------------------------------------------------------------------------------------------------------------------------------------------------------------------------------------------------------------------------------------------------------------------------------------------------------------------------------------------------------------------------------------|---------------------------------------------------------------------------------------------------------------------------------------------------------------------------------------------------------------------------------------------------------------------------------------------------------------------------------------------------------------------------------------------------------------------------------------------------------|---------------------------------------------------------------------------------------------------------------------------------------------------------------------------------------------------------------------------------------------------------------------------------------------------------------------------------------------------------------------------------------------------------------------------------------------------------------------------------------------------------------------------------------------------------------------------------------------------------------------------------------------------------------------------------------------------------------------------------------------------------------------------------------------------------------------------------------------------------------------------------------------------------------------------------------------------------------------------------------------------------------------------------------------------------|
| were carried out by the same team reporting potential conflicts of interest.                                                                                                                                                                                                                                                                                                                                                                                                                                                                  |                                                                                                                                                                                                                                                                                                                                                                                                                                                         |                                                                                                                                                                                                                                                                                                                                                                                                                                                                                                                                                                                                                                                                                                                                                                                                                                                                                                                                                                                                                                                         |
| Minocycline                                                                                                                                                                                                                                                                                                                                                                                                                                                                                                                                   |                                                                                                                                                                                                                                                                                                                                                                                                                                                         |                                                                                                                                                                                                                                                                                                                                                                                                                                                                                                                                                                                                                                                                                                                                                                                                                                                                                                                                                                                                                                                         |
| <p>Nine meta-analyses including up to 13 RCTs were identified [13–15,17,37–41], of which four were considered of high quality[13,14,38,39]. All high-quality meta-analyses found significant improvement of negative symptoms with minocycline but non-significant results for positive symptoms. Conflicting results were obtained regarding general psychopathology. Of these 13 RCTs, only eight were included in the present recommendations, because the others were not available. Sample sizes ranged from 33 to 200 participants.</p> | <p>Minocycline doses ranged from 50 to 300mg/day (mostly 100-200mg/day) for 8 to 52 weeks.</p> <p>Four RCTs explored the effectiveness of minocycline augmentation in chronic schizophrenia[4,42–44], and four in early-phase schizophrenia[45–48].</p> <p>Three RCTs explored the effectiveness of minocycline co-initiation in the acute phase of schizophrenia (one in early-phase schizophrenia) [47], and two in chronic schizophrenia [4,44].</p> | <p>Among the two RCTs with low risk of bias exploring the effectiveness of minocycline 200mg/day augmentation for at least 12-16 weeks, one found effectiveness for negative symptoms and general psychopathology and one found non significant results (positive symptoms: <b>WFSBP-grade -1</b>, negative symptoms and general psychopathology : <b>WFSBP-grade 2</b>). One RCT with low risk of bias found non significant results for all symptoms dimensions for resistant schizophrenia (patients treated with clozapine) (<b>WFSBP-Grade -2</b>). The only RCT with low risk of bias exploring cognition found non-significant results (<b>WFSBP-grade -2</b>).</p> <p>Minocycline 200 mg/day co-initiation with antipsychotics may be effective for improving negative symptoms (<b>WFSBP-grade 2</b>).</p> <p>For minocycline, the largest trial in early-phase schizophrenia was negative, and future trials should focus on enriched populations with chances of responding to a medication based on the medication mechanism of action.</p> |
| PUFA                                                                                                                                                                                                                                                                                                                                                                                                                                                                                                                                          |                                                                                                                                                                                                                                                                                                                                                                                                                                                         |                                                                                                                                                                                                                                                                                                                                                                                                                                                                                                                                                                                                                                                                                                                                                                                                                                                                                                                                                                                                                                                         |

|                                                                                                                                                                                                                                                                                                                                                                                                                                                                                                                                                                                                                                                                                                                                                                                                                                                                                                                                                                                                                                                                                      |                                                                                                                                                                                                                                                                                                                                                                                                                                                                               |                                                                                                                                                                                                                                                                                                                                                                                                                                                                                                                                                                                                                                                                                                                                                                                                                                                                                                                                                                                                                                                                                                                                                    |
|--------------------------------------------------------------------------------------------------------------------------------------------------------------------------------------------------------------------------------------------------------------------------------------------------------------------------------------------------------------------------------------------------------------------------------------------------------------------------------------------------------------------------------------------------------------------------------------------------------------------------------------------------------------------------------------------------------------------------------------------------------------------------------------------------------------------------------------------------------------------------------------------------------------------------------------------------------------------------------------------------------------------------------------------------------------------------------------|-------------------------------------------------------------------------------------------------------------------------------------------------------------------------------------------------------------------------------------------------------------------------------------------------------------------------------------------------------------------------------------------------------------------------------------------------------------------------------|----------------------------------------------------------------------------------------------------------------------------------------------------------------------------------------------------------------------------------------------------------------------------------------------------------------------------------------------------------------------------------------------------------------------------------------------------------------------------------------------------------------------------------------------------------------------------------------------------------------------------------------------------------------------------------------------------------------------------------------------------------------------------------------------------------------------------------------------------------------------------------------------------------------------------------------------------------------------------------------------------------------------------------------------------------------------------------------------------------------------------------------------------|
| <p>Eight meta-analyses published between 2006 and 2021 explored the effects of PUFAs on schizophrenia[13–15,38,49–52]. Five had a low risk of bias[13,14,38,50,52]. The meta-analysis with the highest number of included RCTs (N=14) [13] found a small but significant improvement in positive symptoms and general psychopathology and non-significant results for negative symptoms in the groups receiving adjunctive PUFAs compared to those receiving placebo. Adjunctive PUFA use was also associated with a significant improvement in triglyceride blood levels but not body mass index, fasting glucose, total cholesterol, low-density lipoprotein cholesterol, or C-reactive protein. These results were maintained after removing high-risk of bias studies and those with small sample sizes. Meta-regression analyses revealed no effect of age, illness duration, dosage of PUFAs, eicosapentaenoic acid (EPA) / docosahexaenoic (DHA) ratio and triglyceride levels on these outcomes. No additional RCT was retrieved from our searches, and the 14 RCTs were</p> | <p>Eight RCTs explored the effectiveness of 1,000-3,000 mg/day EPA alone [55,57,61–64,66,67] and the rest tested a combination of EPA (396-1,080mg/day) with DHA (264-880 mg/day). Only one RCT has tested delivery of DHA alone[62]. The trial durations ranged from 6 to 26 weeks. All RCTs were carried out in patients with chronic schizophrenia except two that were carried out in acute phase first-episode [60,67] and one in early-phase schizophrenia [58,59].</p> | <p>PUFAs augmentation in chronic schizophrenia has no significant effect on positive and negative symptoms (WFSBP-grade -1) and cognition (WFSBP-grade -2). However, PUFAs can improve general psychopathology (WFSBP-grade 1), which may correspond to symptoms of anxiety and/or depression associated with schizophrenia - but specific RCTs are needed to confirm this. In the acute phase of chronic schizophrenia, PUFAs co-initiation with antipsychotics has a non-significant effects on positive symptoms (WFSBP-grade -2) but may be effective when prescribed for at least 16 weeks in patients with low PUFA blood levels (with at least 2,000mg/day EPA) (WFSBP-grade 2). In first-episode schizophrenia, PUFAs co-initiation with antipsychotics may be effective for general psychopathology (WFSBP-grade 2) but not for positive and negative symptoms (WFSBP-grade -2). In early-phase schizophrenia, PUFAs co-initiation with antipsychotics for at least 16 weeks (with at least 740mg/day EPA and 400 mg/day DHA) may be effective for depression, anxiety, and cognition in patients with schizophrenia (WFSBP-grade 2).</p> |
|--------------------------------------------------------------------------------------------------------------------------------------------------------------------------------------------------------------------------------------------------------------------------------------------------------------------------------------------------------------------------------------------------------------------------------------------------------------------------------------------------------------------------------------------------------------------------------------------------------------------------------------------------------------------------------------------------------------------------------------------------------------------------------------------------------------------------------------------------------------------------------------------------------------------------------------------------------------------------------------------------------------------------------------------------------------------------------------|-------------------------------------------------------------------------------------------------------------------------------------------------------------------------------------------------------------------------------------------------------------------------------------------------------------------------------------------------------------------------------------------------------------------------------------------------------------------------------|----------------------------------------------------------------------------------------------------------------------------------------------------------------------------------------------------------------------------------------------------------------------------------------------------------------------------------------------------------------------------------------------------------------------------------------------------------------------------------------------------------------------------------------------------------------------------------------------------------------------------------------------------------------------------------------------------------------------------------------------------------------------------------------------------------------------------------------------------------------------------------------------------------------------------------------------------------------------------------------------------------------------------------------------------------------------------------------------------------------------------------------------------|

|                                                                                                                                                                                                                                                                                                                                                                                                                                                                                                                                                         |                                                                                                                                                                                                                                                                                                                                                                                                                                                                                                                                                                                                                                                                                                                                                 |                                                                                                                                                                                                                                                                                                                                                                                                          |
|---------------------------------------------------------------------------------------------------------------------------------------------------------------------------------------------------------------------------------------------------------------------------------------------------------------------------------------------------------------------------------------------------------------------------------------------------------------------------------------------------------------------------------------------------------|-------------------------------------------------------------------------------------------------------------------------------------------------------------------------------------------------------------------------------------------------------------------------------------------------------------------------------------------------------------------------------------------------------------------------------------------------------------------------------------------------------------------------------------------------------------------------------------------------------------------------------------------------------------------------------------------------------------------------------------------------|----------------------------------------------------------------------------------------------------------------------------------------------------------------------------------------------------------------------------------------------------------------------------------------------------------------------------------------------------------------------------------------------------------|
| <p>included in the present recommendations [53–67].<br/>Sample sizes ranged from 20 to 85 participants.</p>                                                                                                                                                                                                                                                                                                                                                                                                                                             |                                                                                                                                                                                                                                                                                                                                                                                                                                                                                                                                                                                                                                                                                                                                                 |                                                                                                                                                                                                                                                                                                                                                                                                          |
| <p>Aspirin</p> <p>Seven meta-analyses[12–15,68–70] including two to four RCTs explored the effectiveness of adjunctive aspirin in schizophrenia. All but one [15] had a low risk of bias. The latest meta-analysis [70] was the only one to include four RCTs and concluded there was no significant effect of adjunctive aspirin on any symptom dimension, with low heterogeneity. Four RCTs were included in the recommendations[70–72]. There was no risk of bias due to a conflict of interest. The sample size ranged from 40 to 200 patients.</p> | <p>The aspirin doses ranged from 325 to 1,000 mg/day for 6 to 16 weeks, combined with omeprazole or pantoprazole to prevent gastrointestinal side-effects.</p> <p>All studies included in and outpatients. The results of two RCTs were published in the same article[70], and one RCT had three arms, comparing 325 mg/day and 500 mg/day aspirin to placebo[72]. In addition, one RCT included patients with an illness duration&lt;10 years [72], one patient in the acute phase with at least two years of illness duration [72], and two included patients with at least two psychotic episodes[70]. Notably, one RCT included patients with low-grade peripheral inflammation defined by a CRP blood level<math>\geq</math>1mg/L[70].</p> | <p>Aspirin augmentation is not recommended for schizophrenia, neither for the psychotic symptomatology nor for cognition (WFSBP-grade -2).</p> <p>However, there is weak evidence for the efficacy of 325 to 500 mg/day aspirin on positive and negative symptoms, and on general psychopathology in co-initiation with antipsychotics (combined with omeprazole) and for six weeks (WFSBP-grade 3).</p> |

|                                                                                                                                                                                                                                                                                                                                                                                                                                                                                                                                                                                                                                                                                                       |                                                                                                                                                                                                                                                                                                                                                    |                                                                                                                                                                                                                                                                                                                                                                                                      |
|-------------------------------------------------------------------------------------------------------------------------------------------------------------------------------------------------------------------------------------------------------------------------------------------------------------------------------------------------------------------------------------------------------------------------------------------------------------------------------------------------------------------------------------------------------------------------------------------------------------------------------------------------------------------------------------------------------|----------------------------------------------------------------------------------------------------------------------------------------------------------------------------------------------------------------------------------------------------------------------------------------------------------------------------------------------------|------------------------------------------------------------------------------------------------------------------------------------------------------------------------------------------------------------------------------------------------------------------------------------------------------------------------------------------------------------------------------------------------------|
| Celecoxib                                                                                                                                                                                                                                                                                                                                                                                                                                                                                                                                                                                                                                                                                             |                                                                                                                                                                                                                                                                                                                                                    |                                                                                                                                                                                                                                                                                                                                                                                                      |
| <p>Seven meta-analyses [12–15,38,68,73], including three to eight RCTs explored the effect of celecoxib in schizophrenia. Five had a low risk of bias [12–14,38,68]. Five RCTs were included in our review [74–78]. One meta-analysis [73] included two studies written in Chinese [79,80] and one study report results based on similar data [75] that were not included. A potential risk of bias due to conflict of interest was identified in three RCTs [75,76,78]. Sample sizes ranged from 35 to 270. All meta-analyses highlighted substantial-to-high heterogeneity between studies and failed to show a significant improvement in patients treated with celecoxib compared to placebo.</p> | <p>The celecoxib dose was 400mg/day in all trials in addition to antipsychotics. The observation period lasted from five to 11 weeks.</p> <p>One study included only first-episode patients [75], three studies only chronic schizophrenia patients [74,77,78], and one study with both first-episode and chronic schizophrenia patients [76].</p> | <p>400mg/day celecoxib may improve positive symptoms and general psychopathology in co-initiation with risperidone in the acute phase of chronic schizophrenia (WFSBP-grade 2) but not negative symptoms (WFSBP-grade -2). Celecoxib augmentation in stabilized outpatients is also not recommended (WFSBP-grade -2). No data were available about celecoxib's effectiveness on cognition.</p>       |
| Estrogens                                                                                                                                                                                                                                                                                                                                                                                                                                                                                                                                                                                                                                                                                             |                                                                                                                                                                                                                                                                                                                                                    |                                                                                                                                                                                                                                                                                                                                                                                                      |
| <p>Three meta-analyses specifically explored the effectiveness of estrogens in schizophrenia (without pooling estrogens with Selective Estrogen Receptor Modulators (SERM's)) [15,38,81], including up to seven RCTs[15,38] with one RCT having three treatment arms (two doses) [82]. Two were rated as having a low risk</p>                                                                                                                                                                                                                                                                                                                                                                        | <p>Authors used either transdermal estradiol 0.05 g/day to 0.2 g/day[82,83,86], conjugated oral estrogens 0.625 mg/day[84,88,89], ethynyl estradiol 0.05 mg/day[90] or estradiol valerate 2g/day [87] vs. placebo. The trials duration ranged from two to eight weeks.</p>                                                                         | <p>Eight-week estrogen supplementation has a good acceptability and no RCT reported serious adverse events or increased rate of dropout in the groups with active treatments compared to placebo. All RCTs that included females included premenopausal/childbearing aged women to prevent the risk of increased thromboembolism and cancer with estrogen substitution in post-menopausal women.</p> |

|                                                                                                                                                                                                                                                                                                                                                                                                                                                                                                                                                                                                                                                                                                                                                                                                                                                                                                                            |                                                                                                                                                                                                                                            |                                                                                                                                                                                                                                                                                                                                                                                                                                                                                                                                                                                                                                                                                                                                                                                                                                                                                                                                                                                                                                                                                                                                                                                                                                                                |
|----------------------------------------------------------------------------------------------------------------------------------------------------------------------------------------------------------------------------------------------------------------------------------------------------------------------------------------------------------------------------------------------------------------------------------------------------------------------------------------------------------------------------------------------------------------------------------------------------------------------------------------------------------------------------------------------------------------------------------------------------------------------------------------------------------------------------------------------------------------------------------------------------------------------------|--------------------------------------------------------------------------------------------------------------------------------------------------------------------------------------------------------------------------------------------|----------------------------------------------------------------------------------------------------------------------------------------------------------------------------------------------------------------------------------------------------------------------------------------------------------------------------------------------------------------------------------------------------------------------------------------------------------------------------------------------------------------------------------------------------------------------------------------------------------------------------------------------------------------------------------------------------------------------------------------------------------------------------------------------------------------------------------------------------------------------------------------------------------------------------------------------------------------------------------------------------------------------------------------------------------------------------------------------------------------------------------------------------------------------------------------------------------------------------------------------------------------|
| <p>of bias [38,81], and all suggested the effectiveness of adjunctive estrogens in positive and negative symptoms in women with schizophrenia. Therefore, two additional RCTs (one with low risk of bias[83] and one with moderate risk of bias [84]) were added to the present recommendations for a total of nine RCTs (one with three arms).</p> <p>Five RCTs were carried out by the same Australian team [82,85–87]. Two studies compared three arms, i.e., with two doses of estrogens (co-initiation of 0.05 mg/day and 0.1 mg/day transdermal estradiol vs. placebo in acute phase schizophrenia [85] and augmentation by transdermal estradiol 0.1 mg/day and 0.2 mg/day)[82]. The sample sizes ranged from 24 to 200. Of note, the last RCT with a low risk of bias and high sample size reported that the effectiveness was almost entirely due to the sample of women aged <math>\geq 38</math> years[83].</p> | <p>All RCTs included patients with chronic schizophrenia except one with a small proportion of first-episode patients [87]. In addition, all RCTs were carried out in women of childbearing-age, except for one conducted in men [87].</p> | <p>Eight-week transdermal estradiol augmentation appears effective in improving positive symptoms and general psychopathology in childbearing-aged women with chronic schizophrenia with provisional evidence of effectiveness but uncertain evidence of safety (WFSBP-grade 2) and with only limited evidence for negative symptoms (WFSBP-grade 2). Estrogen supplementation may be more effective in women aged <math>\geq 38</math> years. The optimal recommended form and dose for effectiveness appears to be transdermal estradiol 0.2 mg/day. Altogether, data are lacking for longer treatment durations in terms of effectiveness and safety, especially given that the most worrisome adverse events like cancer may take many years to manifest. We therefore took the decision not to recommend them at the highest level.</p> <p>Eight weeks oral 0.05 mg/day ethynyl estradiol co-initiation with antipsychotics may improve all symptom dimensions of chronic schizophrenia in childbearing aged women inpatients (WFSBP-grade 2).</p> <p>Adjunctive oral estradiol valerate 2 mg/day may be effective for general psychopathology in men with limited evidence (WFSBP-grade 2), but this treatment has been tested for only two weeks in</p> |
|----------------------------------------------------------------------------------------------------------------------------------------------------------------------------------------------------------------------------------------------------------------------------------------------------------------------------------------------------------------------------------------------------------------------------------------------------------------------------------------------------------------------------------------------------------------------------------------------------------------------------------------------------------------------------------------------------------------------------------------------------------------------------------------------------------------------------------------------------------------------------------------------------------------------------|--------------------------------------------------------------------------------------------------------------------------------------------------------------------------------------------------------------------------------------------|----------------------------------------------------------------------------------------------------------------------------------------------------------------------------------------------------------------------------------------------------------------------------------------------------------------------------------------------------------------------------------------------------------------------------------------------------------------------------------------------------------------------------------------------------------------------------------------------------------------------------------------------------------------------------------------------------------------------------------------------------------------------------------------------------------------------------------------------------------------------------------------------------------------------------------------------------------------------------------------------------------------------------------------------------------------------------------------------------------------------------------------------------------------------------------------------------------------------------------------------------------------|

|                                                                                                                                                                                                                                                                                                                                                                                                                                                                                                                                                                                                                                                                                                                                                                                                                                                                         |                                                                                                                                                                                                                                                                                                                                                                                                                                                                                                                                        |                                                                                                                                                                                                                                                                                                                                                                                                                                                                                                                                                                                                                                                               |
|-------------------------------------------------------------------------------------------------------------------------------------------------------------------------------------------------------------------------------------------------------------------------------------------------------------------------------------------------------------------------------------------------------------------------------------------------------------------------------------------------------------------------------------------------------------------------------------------------------------------------------------------------------------------------------------------------------------------------------------------------------------------------------------------------------------------------------------------------------------------------|----------------------------------------------------------------------------------------------------------------------------------------------------------------------------------------------------------------------------------------------------------------------------------------------------------------------------------------------------------------------------------------------------------------------------------------------------------------------------------------------------------------------------------------|---------------------------------------------------------------------------------------------------------------------------------------------------------------------------------------------------------------------------------------------------------------------------------------------------------------------------------------------------------------------------------------------------------------------------------------------------------------------------------------------------------------------------------------------------------------------------------------------------------------------------------------------------------------|
|                                                                                                                                                                                                                                                                                                                                                                                                                                                                                                                                                                                                                                                                                                                                                                                                                                                                         |                                                                                                                                                                                                                                                                                                                                                                                                                                                                                                                                        | one RCT, and additional trials with longer duration are needed to determine the effectiveness and safety of estradiol valerate.                                                                                                                                                                                                                                                                                                                                                                                                                                                                                                                               |
| <b>Selective Estrogen Receptor Modulators (SERMs)</b>                                                                                                                                                                                                                                                                                                                                                                                                                                                                                                                                                                                                                                                                                                                                                                                                                   |                                                                                                                                                                                                                                                                                                                                                                                                                                                                                                                                        |                                                                                                                                                                                                                                                                                                                                                                                                                                                                                                                                                                                                                                                               |
| Six meta-analyses have explored the effectiveness of adjunctive raloxifene in schizophrenia [13–15,38,91–93]. Three meta-analyses were of high quality [13,14,91] and included five to eight RCTs [94–101]. The results of two RCTs were published in the same article [97]. Three studies that assessed cognitive outcomes were published since the publication of the last meta-analysis and were included in the present recommendations. Two studies were related to the same RCT, so the recommendations were based on 10 RCTs [94–104]. Sample sizes ranged between 35 and 200 participants. The overall risk of bias regarding conflict of interest was low. The only meta-analysis with a low risk of bias and analyzing raloxifene alone concluded that raloxifene was effective in improving positive and negative symptoms and general psychopathology [91]. | Doses of raloxifene ranged from 60 to 120mg/day for six 6 to 24 weeks.<br>All RCTs were carried out in patients with chronic schizophrenia. All but two RCTs [94,95] were carried out in clinically stabilized patients. All but three RCTs included peri- or post-menopausal women only (one included men only in the acute phase schizophrenia [94] and two both sexes [100,104]). All RCTs included in- and outpatients, except for one RCT that included only inpatients [95]; two did not report hospitalization status [97,104]. | 60-120 mg/day raloxifene augmentation cannot be currently recommended in peri or post-menopausal women with schizophrenia, especially for positive and negative symptoms and for cognitive functioning in chronic schizophrenia (WFSBP-grade -2).<br>Indeed, despite a relatively good acceptability of SERM, among the five RCTs with a low risk of bias, one with the largest sample size (larger than the remaining four RCTs) reported a worsening of all symptom dimensions.<br>120 mg/day raloxifene co-initiation with antipsychotics may improve negative symptoms and general psychopathology in men with acute-phase schizophrenia (WFSBP-grade 2). |

1 **Supplementary material 8.** Context/rationale for the efficacy of each  
2 molecule, RCTs' global conclusions and risk of bias and subgroup  
3 analyses  
4

5 **N-acetyl-cysteine (NAC)**

6 NAC is a neuroprotective agent with antioxidative, anti-inflammatory and glutamatergic  
7 properties [105].

8 **RCTs' global conclusions and risk of bias**

9 Regarding NAC augmentation for negative symptoms and general psychopathology, one RCT with  
10 low risk of bias found significant improvement after 12 weeks of 1,200mg/day administration  
11 [25], vs. one with low risk of bias finding non-significant results after 26 weeks of 2,700 mg/day  
12 administration [21]. Three meta-analyses (one with low and two with moderate risk of bias) found  
13 significant results vs. one meta-analysis (with moderate risk of bias) finding non-significant result.  
14 (LoE A: "provisional")

15 Regarding NAC augmentation for positive symptoms, one RCT with low risk of bias [25]) found  
16 significant improvement vs. one with low risk of bias h finding non-significant results. One meta-  
17 analysis (with low risk of bias) showed significant improvement in positive symptoms. (LoE B:  
18 "limited")

19 Regarding cognition, two RCTs with low risk of bias [21,25] found some significant improvement  
20 vs. no RCT with low risk of bias finding non-significant results. Two meta-analyses concluded to  
21 significant improvement of working memory but results were not convergent for all cognitive  
22 tests. (LoE B: "limited")

23 Regarding NAC coinication for negative symptoms one RCT with low risk of bias [23] found a  
24 significant improvement vs. no RCT reported non-significant results (LoE B: "limited"). The same  
25 RCT found non-significant results for general psychopathology (LoE -B: "limited").

26 **Subgroup analyses**

27 NAC in early psychosis

28 No RCT with low risk of bias found significant improvement of any symptom dimension in early  
29 psychosis vs. one with low risk of bias finding non-significant results (26 weeks, 2,700 mg/day  
30 [21]). (LoE -B: "limited")  
31

32 **Sarcosine**

33 Sarcosine, also known as *N*-methylglycine, is an intermediate and byproduct in glycine synthesis  
34 and degradation and a non-selective glycine-reuptake inhibitor mediated by GlyT1. Sarcosine is  
35 rapidly degraded to glycine, which, in addition to its importance as a constituent of proteins, plays



36 a significant role in various physiological processes as a prime metabolic source of components  
37 of living cells such as glutathione, creatine, purines and serine [106].

### 38 **RCTs' global conclusions and risk of bias**

39 In patients with non-resistant schizophrenia, sarcosine 2g/day augmentation was associated with  
40 a significant improvement of positive, negative symptoms, general psychopathology and  
41 cognition in respectively zero, two, zero and one RCTs with moderate risk of bias. vs. respectively  
42 one, one, one and zero RCT finding non-significant results (positive symptoms: LoE -C: "weak",  
43 negative symptoms: LoE C: "weak", general psychopathology: LoE -C: "weak", cognition: LoE B:  
44 "limited").

45 Regarding cognition, one RCT with moderate risk of bias [35] found mixed results and one with  
46 high risk of bias [33] non-significant results.

47 In patients with treatment-resistant schizophrenia, sarcosine 2g/day augmentation was  
48 associated with non-significant results in all symptoms' dimensions in one RCT [36] with high risk  
49 of bias. No RCT reported significant improvement (LoE -C: "weak").

50 Sarcosine 2g/day cointitiation with antipsychotics in acute phase chronic schizophrenia was  
51 associated with significant improvement in negative symptoms and general psychopathology in  
52 one RCT [34] with moderate risk of bias. No RCT reported non-significant results (LoE B "limited").

### 53 **Subgroup analyses**

54 One 24-week long RCT with moderate risk of bias [5] reported significant improvement of  
55 negative symptoms in the group treated with sarcosine 2g/day. One 12-week long RCT [35] with  
56 moderate risk of bias reported non-significant results. (LoE B: "limited")

57

### 58 **Minocycline**

59 Minocycline is a second-generation tetracycline antibiotic with a good penetration into the brain  
60 and with anti-inflammatory anti-apoptotic and anti-oxidant actions, modulating glutamate and  
61 monoamine neurotransmission and also, possibly, modulating microbiota composition [107].

### 62 **RCTs' global conclusions and risk of bias**

63 Regarding minocycline augmentation, one RCT with low risk of bias found a significant  
64 improvement of negative symptoms (but not positive symptoms, general psychopathology and  
65 cognition) in chronic schizophrenia [42], vs. one RCT with low risk of bias finding non-significant  
66 results[48].

67 One RCT with low risk of bias found non-significant results for all symptoms' dimensions in  
68 patients with resistant schizophrenia treated with clozapine [43] (LoE -B: "limited").

69 Regarding cognition, one RCTs with low risk of bias [43] found non-significant results with  
70 minocycline 200 mg/day for 10 to 16 weeks (LoE -A: "provisional").

71 Regarding minocycline co-initiation in patients with acute phase chronic schizophrenia, one RCT  
72 with low risk of bias [4] with three arms (minocycline 100mg/day, 200 mg/day and placebo) found  
73 a significant improvement of negative symptoms in the minocycline 200mg/day arm but non-  
74 significant results in the other arms (minocycline 200mg/day: LoE B: "limited", minocycline  
75 100mg/day: LoE -B: "limited") and non-significant results in all arms for positive symptoms and  
76 general psychopathology (LoE -B: "limited"). For cognition, one RCT with moderate risk of bias  
77 [44] found non-significant results (LoE -B: "limited").

#### 78 **Subgroup analyses**

79 Regarding minocycline long-term augmentation ( $\geq 12$  weeks) in early schizophrenia, one RCT with  
80 low risk of bias found non-significant results for all symptoms dimensions for minocycline 300  
81 mg/day for 52 weeks [48] (LoE -B: "limited"). Regarding cognition, one RCT with moderate risk of  
82 bias [46] found non-significant results (LoE -B: "limited").

83

#### 84 **PUFAs**

85 Lower levels of PUFAs have been reported in the blood of people with schizophrenia compared  
86 to healthy volunteers [108]. PUFAs have anti-inflammatory properties and may be associated with  
87 cognitive impairment [109].

#### 88 **RCTs' global conclusions and risk of bias**

89 Six RCTs[61–66] explored the effectiveness of adjunctive PUFA augmentation in chronic patients  
90 with schizophrenia. One RCT with low risk of bias[64] reported a significant improvement of  
91 general psychopathology, while one other with low risk of bias found non-significant results [66]  
92 (LoE B: "limited"). Regarding positive and negative symptoms, the two RCTs with low risk of bias  
93 [64,66] found non-significant results (LoE -A: "provisional"). Regarding cognition, one RCT[63]  
94 with moderate risk of bias found non-significant results (LoE B: "limited").

95 Seven RCTs explored the effectiveness of adjunctive PUFA coinication with antipsychotic  
96 treatments in acute phase of schizophrenia[54–60,67].

97 Regarding positive symptoms, one RCT with low risk of bias[57] showed significant improvement  
98 of positive symptoms on patients with low blood level of PUFA, while one RCT with low risk of  
99 bias [60] found non-significant results (but without measuring PUFA blood levels). One meta-  
100 analysis[13] with low risk of bias including the highest number of studies found a small but  
101 significant improvement of positive symptoms (patients with low PUFA blood level: LoE B  
102 "limited").

103 Regarding negative symptoms, two RCTs with low risk of bias[57,60] found non-significant results.  
104 (LoE -A: "provisional")

105 Regarding general psychopathology, one RCT[60] with low risk of bias found significant  
106 improvement vs. one with low risk of bias finding non-significant results[57]. One meta-  
107 analysis[13] with low risk of bias including the highest number of studies found a small but

108 significant improvement of general psychopathology (LoE B: “limited”). Regarding cognition, only  
109 one RCT with moderate risk of bias [59] found improvement in some tests but not in others (LoE  
110 B: “limited”).

#### 111 **Subgroup analysis**

112 Regarding illness course of schizophrenia, one RCT with low risk of bias [60] found a significant  
113 improvement of general psychopathology in first episode schizophrenia after 26 weeks of PUFA  
114 administration(LoE B: “limited”). No significant improvement was observed for positive and  
115 negative symptoms (LoE -B: “limited”).

116 Regarding PUFAs and doses in RCT with low risk of bias and significant results, one RCT[60] found  
117 that patients treated with adjunctive EPA 1320 DHA 880 mg/day fish oil co-initiation for 26 weeks  
118 had a significant improvement on general psychopathology compared to those treated with  
119 placebo. In the second RCT[57], adjunctive EPA 2,000mg/day co-initiation was effective in  
120 improving positive symptoms of chronic schizophrenia only in patients with low PUFA level.

121

#### 122 **COX inhibitors (Aspirin, Celecoxib)**

123 The inflammatory hypothesis for schizophrenia has been supported by evidence from basic  
124 science, epidemiological associations and biomarkers studies [110,111]. Cyclooxygenase (COX)  
125 inhibitors (including anti-COX-1 low-dose aspirin, anti-COX-2 celecoxib and anti-COX1/anti-COX2  
126 high-dose aspirin) suppress the production of prostaglandins and thromboxanes involved in the  
127 inflammatory processes [112]. Aspirin also reduces the hypothalamic-pituitary-adrenal axis  
128 response [113]. In contrast to celecoxib which can easily cross the blood-brain barrier, aspirin  
129 levels in the central nervous system are lower than in peripheral blood [114]. They have been the  
130 most studied COX inhibitors in schizophrenia thus far.

131

#### 132 **Aspirin**

133 RCTs’ global conclusions and risk of bias

134 Three RCTs were classified with moderate risk of bias[70,71] and one with high risk of bias[72].

135 Two RCTs with moderate risk of bias reported no significant effect of aspirin augmentation in  
136 chronic schizophrenia[70] vs. one RCT with moderate risk of bias finding significant improvement  
137 of positive symptoms in the group treated with 1,000mg/day aspirin+pantoprazole and non-  
138 significant results for negative symptoms and general psychopathology)[71] (all symptoms  
139 dimensions LoE -B “limited”).

140 One RCT with high risk of bias reported significant improvement of all symptoms dimensions in  
141 the two arms receiving aspirin 325mg/day and 500 mg/day combined with omeprazole [72] (LoE  
142 C “weak”).

143 On the three studies exploring cognition, all reported non-significant effects of aspirin  
144 augmentation[70] or co-initiation[71].

145

#### 146 **Celecoxib**

##### 147 **RCTs' global conclusions and risk of bias**

148 One RCT with moderate risk of bias found non-significant results for celecoxib augmentation in  
149 chronic schizophrenia[77] (LoE -B "limited").

150 One RCT with low risk of bias found significant improvement of positive symptoms and general  
151 psychopathology in acute phase of chronic schizophrenia inpatients treated with a combination  
152 of risperidone 6mg/day + celecoxib compared to risperidone 6 mg/day + placebo, and non-  
153 significant results for negative symptoms [74] (positive symptoms and general psychopathology  
154 LoE B "limited", negative symptoms LoE -B "limited").

##### 155 **Subgroup analyses**

156 One meta-analysis suggested that celecoxib might exhibit better results in patients with first  
157 episode schizophrenia [73] but the two related studies[75,76] had a moderate risk of bias and  
158 obtained contradictory results: improvement of negative symptoms in only one RCT [75], or of  
159 general psychopathology in the other RCT [76] (negative symptoms and general psychopathology  
160 LoE B "limited", positive symptoms LoE -B "limited").

161

#### 162 **Estrogens and Selective Estrogen Receptor Modulators (SERM)**

163 Steroid hormones modulate neurotransmitter system, neuroplasticity, memory and learning,  
164 innate immune signaling pathways and inflammatory mediators with sex differences.

165

#### 166 **Estrogens**

##### 167 **RCTs' global conclusions and risk of bias**

168 Transdermal estradiol 0.1 to 0.2mg/day augmentation was associated with significant  
169 improvement of positive symptoms and general psychopathology of chronic stabilized  
170 schizophrenia in women of child-bearing age in three RCTs with low risk of bias (one with three  
171 arms reporting similar effects in the two active arms)[82,83,86], with no RCT with low risk of bias  
172 finding non-significant results. (LoE A: "provisional")

173 Transdermal estradiol 0.2mg/day augmentation was associated with significant improvement of  
174 negative symptoms of chronic stabilized schizophrenia in women in one RCT with low risk of bias  
175 [83] vs. non-significant results in two RCTs with low risk of bias carried out by the same team (two  
176 with 0.1mg/day and one arm with 0.2mg/day)[82,86]. The meta-analyses reported significant  
177 improvement of negative symptoms (LoE B: "limited")

178 Oral 0.625 mg conjugated estrogen with 2.5 mg of medroxyprogesterone acetate was associated  
179 with significant improvement of negative symptoms of chronic stabilized schizophrenia in women  
180 of child-bearing age in one RCT with low risk of bias[88] with no RCT with low risk of bias reporting  
181 non-significant results. (LoE B: “limited”)

182 Oral 0.05 mg ethynyl estradiol co-initiation with antipsychotics has shown significant  
183 improvement in all symptom dimensions of chronic schizophrenia in one RCT with low risk of bias  
184 including childbearing aged female inpatients [90]. (LoE B: “limited”)

185 Oral 0.625 mg conjugated estrogen co-initiation with antipsychotics has shown non-significant  
186 results in all symptom dimensions of chronic schizophrenia in one RCT with moderate risk of bias  
187 including childbearing aged women [84]. (LoE -B: “limited”)

188 Adjunctive oral estradiol valerate 2mg/day for two weeks was associated with significant  
189 improvement of general psychopathology in men in one RCT with moderate risk of bias [87] (LoE  
190 B: “limited”). Of note, no feminization side effects were reported in this RCT probably due to the  
191 short duration of treatment.

192

### 193 **SERM**

#### 194 **RCTs’ global conclusions and risk of bias**

195 Raloxifene 60-120 mg/day augmentation was associated with contradictory results on symptoms  
196 of schizophrenia, in five RCTs with low risk of bias [96,98–101].

197 Regarding cognition, two RCTs with low risk of bias found a significant improvement in some tests  
198 but not in others [100] [104]. Both RCTs included both men and women. Two other RCTs including  
199 only peri- or post-menopausal women (and published in three papers) found non-significant  
200 results [96,101,102] and one meta-analysis with low risk of bias [115]found non significant results  
201 on cognition (LoE B “limited”).

202 In men, raloxifene 120 mg/day coinication with antipsychotics was associated with significant  
203 improvement in negative symptoms and general psychopathology (LoE B: “limited”) (but not in  
204 positive symptoms) with acute phase schizophrenia in one RCT with low risk of bias [94].

205 In post-menopausal women, raloxifene 120 mg/day coinication with antipsychotics was  
206 associated with significant improvement in positive symptoms in one RCT with moderate risk of  
207 bias [95] (LoE B: “limited”).

#### 208 **Subgroup analyses**

209 Concerning long-term administration, in one RCT with moderate risk of bias lasting 24 weeks  
210 [98,103], adjunctive 60 mg/day raloxifene was associated with significant improvement of  
211 negative symptoms and general psychopathology (LoE B: “limited”) but not positive symptoms  
212 and cognition (LoE -B: “limited”).

213 Three RCTs with low risk of bias included only peri or post-menopausal women [96,99,101,102],  
214 raloxifene 60-120mg/day augmentation was associated with contradictory results. Regarding  
215 negative symptoms, one RCT (n=32) showed a significant improvement [99], one (n=69) showed

216 non-significant results [96], and one (n=174) showed significant worsening [101] (LoE -B:  
217 "limited"). Regarding general psychopathology, two RCTs showed a significant improvement [99]  
218 [96], and one (n=174) showed significant worsening [101] (LoE B: "limited").  
219 No RCT included childbearing-age women (LoE 4 "lack of evidence").  
220  
221

222 **Supplementary material 9. Complementary analyses on sample size, risk**  
223 **of bias and country economic status**  
224

225 Previous meta-analyses (including respectively 56 and 70 RCTs) have reported that effect sizes  
226 were inversely correlated with sample size [13,14]. This means that studies with a larger sample  
227 size have a lower propensity to show significant improvements. Regarding our 63 RCTs, we  
228 performed complementary analyses for each symptom dimension and cognition to estimate  
229 whether or not the probability of observing a significant improvement was influenced by sample  
230 size. Importantly, the analysis was not performed on standardized mean difference but on the  
231 presence/absence of any significant effect as this was used to formulate our recommendations.  
232 Similarly, we have checked a possible influence of the level of risk of bias.

233

234 To investigate the putative influence of sample size or risk of bias on our results, we performed a  
235 series of logistic regression analyses in which the presence(1)/absence(0) of a significant  
236 improvement of positive symptoms, negative symptoms, general psychopathology, cognition was  
237 entered as dependent variables. The total sample size and the risk of bias (low vs. medium vs.  
238 high) were entered successively as predictors.

239 (model 1)  $\text{Improv}(1/0) = \text{cons} + a \times \text{Samplesize}$

240 (model 2)  $\text{Improv}(1/0) = \text{cons} + b \times \text{Riskofbias}$

241 (model 3)  $\text{Improv}(1/0) = \text{cons} + a \times \text{Samplesize} + b \times \text{Riskofbias}$

242 All analyses were performed under a Bayesian framework. For each symptom dimensions, we  
243 calculated:

244 1) the mean ( $M$ ) and credible interval (CI95%) of the coefficient  $a$  and the probability that  $a$   
245 was greater than 0

246 2) the ORs and credible intervals (CI95%) of medium/low, high/medium, high/low and the  
247 probability that each OR was greater than 1.

248 Probabilities were regarded as meaningful if they were either lower than 2.5% or higher than  
249 97.5% [keeping in mind for instance that  $\text{Pr}(\text{low}>\text{high})=1-\text{Pr}(\text{high}>\text{low})$ ].

250 A burn-in of 5,000 iterations followed by 100,000 iterations was used for each of the three chains,  
251 yielding a final 300,000 iteration sample for retrieving the characteristics of the posterior  
252 distribution. Convergence of the Markov chain Monte Carlo (MCMC) sample chains was checked  
253 graphically and was observed in each case. All computations were performed in the R computing  
254 environment with the required additional packages (in particular r2jags).

255

256 Results showed (see results in the table below):

- 257 - no meaningful influence of sample size for all symptom dimensions, except for cognition
- 258 (in both models 1 and 3) in which larger sample sizes were associated with a lower
- 259 probability of significant cognitive improvement
- 260 - a trend for a higher probability to find a significant improvement of positive symptoms
- 261 and of cognition in studies with low compared to moderate risk of bias
- 262 - a higher probability to find a significant improvement of general symptomatology in
- 263 studies with low compared to moderate risk of bias (in both models 2 and 3)

264

265

| Model |                       | Positive symptoms |               |               | Negative symptoms |        |         |        |       |
|-------|-----------------------|-------------------|---------------|---------------|-------------------|--------|---------|--------|-------|
|       |                       | M/OR              | CI 95%        |               | Pr                | M/OR   | CI 95%  |        | Pr    |
| 1     | sample size           | 0.136             | [-0.428       | 0.684]        | 0.692             | -0.188 | [-0.778 | 0.349] | 0.256 |
| 2     | <b>medium vs. low</b> | <b>0.304</b>      | <b>[0.075</b> | <b>1.115]</b> | <b>0.037</b>      | 0.699  | [0.216  | 2.252] | 0.273 |
|       | high vs. low          | 1.060             | [0.200        | 5.391]        | 0.528             | 0.950  | [0.179  | 4.803] | 0.475 |
|       | high vs. medium       | 3.498             | [0.637        | 19.93]        | 0.926             | 1.360  | [0.267  | 6.652] | 0.648 |
| 3     | sample size           | 0.081             | [-0.518       | 0.668]        | 0.612             | -0.221 | [-0.829 | 0.331] | 0.226 |
|       | <b>medium vs. low</b> | <b>0.306</b>      | <b>[0.074</b> | <b>1.138]</b> | <b>0.039</b>      | 0.654  | [0.197  | 2.134] | 0.243 |
|       | high vs. low          | 1.069             | [0.195        | 5.638]        | 0.532             | 0.910  | [0.168  | 4.728] | 0.455 |
|       | high vs. medium       | 3.515             | [0.617        | 20.56]        | 0.922             | 1.391  | [0.267  | 7.098] | 0.656 |

266

| Model |                       | General symptomatology |               |               | Cognition    |               |               |                |                  |
|-------|-----------------------|------------------------|---------------|---------------|--------------|---------------|---------------|----------------|------------------|
|       |                       | M/OR                   | CI 95%        |               | Pr           | M/OR          | CI 95%        |                | Pr               |
| 1     | <b>sample size</b>    | -0.098                 | [-0.662       | 0.437]        | 0.366        | <b>-1.758</b> | <b>[-3.67</b> | <b>-0.408]</b> | <b>0.002</b>     |
| 2     | <b>medium vs. low</b> | <b>0.211</b>           | <b>[0.057</b> | <b>0.709]</b> | <b>0.006</b> | 0.373         | [0.053        | 2.253]         | 0.141            |
|       | high vs. low          | 0.562                  | [0.100        | 3.122]        | 0.252        | 1.221         | [0.029        | 50.90]         | 0.546            |
|       | high vs. medium       | 2.687                  | [0.481        | 15.32]        | 0.873        | 3.297         | [0.075        | 150.8]         | 0.751            |
| 3     | <b>sample size</b>    | -0.199                 | [-0.818       | 0.379]        | 0.256        | <b>-2.882</b> | <b>[-6.10</b> | <b>-0.780]</b> | <b>&lt;0.001</b> |
|       | <b>medium vs. low</b> | <b>0.195</b>           | <b>[0.050</b> | <b>0.677]</b> | <b>0.005</b> | <b>0.101</b>  | <b>[0.005</b> | <b>1.087]</b>  | <b>0.030</b>     |
|       | high vs. low          | 0.521                  | [0.088        | 3.048]        | 0.231        | 0.071         | [0.001        | 5.163]         | 0.107            |
|       | high vs. medium       | 2.683                  | [0.474        | 15.89]        | 0.868        | 0.731         | [0.014        | 40.35]         | 0.433            |

267

268 Note: M=mean, OR=odds ratio, CI95%=credible interval 95%, Pr=probability that  $a > 0$  or  $OR > 1$

269 accordingly

270 In conclusion, we found no significant association between sample size and the probability of

271 observing a significant improvement of positive symptoms, negative symptoms or general



272 symptomatology. However, a higher sample size was associated with a lower probability of  
 273 observing significant cognitive improvement. Studies with a low risk of bias had a higher  
 274 probability than studies with moderate risk of bias of showing a significant improvement in  
 275 general symptomatology. A similar trend was observed for positive symptoms and cognition, but  
 276 not for negative symptoms.

277

278 As some authors have suggested that results may vary between high and middle income  
 279 countries[6], we conducted additional sensitivity analyses in which we examined whether the  
 280 probability to find positive results was higher in upper middle vs. high income countries.

281 Upper middle income countries were: China, India, Iran, Romania/Moldavia, South Africa; high  
 282 income countries were: Australia, Norway, Poland, Spain, South Korea, Switzerland, UK, USA[7].

283 First of all, the proportion of low, moderate, and high risk of bias studies was similar between  
 284 upper middle-income and high-income countries ( $\chi^2 = 4.2$ ,  $p = 0.121$ ).

285 Second, the probability of finding a positive (significant) result was higher in upper middle-income  
 286 studies compared to high-income studies for negative symptoms ( $Pr = 0.992$ ), but not for positive  
 287 symptoms ( $Pr = 0.878$ ) and general symptomatology ( $Pr = 0.870$ ), regardless of the risk of bias.

288 Similar results were obtained when we restricted our analyses to low-risk-of-bias studies. The  
 289 probability of finding a positive (significant) result was higher in upper middle-income countries  
 290 compared to high-income countries for negative symptoms ( $Pr > 0.999$ ), not for positive  
 291 symptoms ( $Pr = 0.744$ ), but showed a trend for general symptomatology ( $Pr = 0.965$ ).

292 When considering only the studies related to NAC, estrogens, and PUFAs (the drugs that have  
 293 shown the best level of evidence for efficacy), similar results were obtained. However, these  
 294 results should be interpreted with caution as the number of studies considered here was quite  
 295 low (between three and five).

296 These analyses thus provide some arguments to question a possible bias associated with the  
 297 country where the study was conducted.

| Country      | Number of studies        | Risk of bias |            |            | Total      |
|--------------|--------------------------|--------------|------------|------------|------------|
|              |                          | Low          | Moderate   | High       |            |
| High         | Total                    | 12 (36.4%)   | 21 (54.6%) | 5 (9.1%)   | 38 (100%)  |
|              | With significant results |              |            |            |            |
|              | Pos (%)                  | 4 (33.3%)    | 4 (22.2%)  | 1 (0%)     | 9 (24.2%)  |
|              | Neg (%)                  | 1 (8.3%)     | 8 (33.3%)  | 1 (0%)     | 10 (21.2%) |
|              | Gen (%)                  | 5 (41.7%)    | 7 (0%)     | 1 (0%)     | 13 (15.2%) |
| Upper middle | Total                    | 13 (41.9%)   | 8 (35.5%)  | 6 (22.6%)  | 27 (100%)  |
|              | With significant results |              |            |            |            |
|              | Pos (%)                  | 6 (30.7%)    | 1 (9.1%)   | 3 (0%)     | 10 (16.1%) |
|              | Neg (%)                  | 10 (61.5%)   | 2 (36.4%)  | 3 (57.1%)  | 15 (51.6%) |
|              | Gen (%)                  | 10 (61.5%)   | 0 (9.1%)   | 3 (57.1%)  | 13 (41.9%) |
| Total        | Total                    | 25 (39.1%)   | 29 (45.3%) | 11 (15.6%) | 65 (100%)  |
|              | With significant results |              |            |            |            |
|              | Pos (%)                  | 10 (32.0%)   | 5 (27.6%)  | 4 (0%)     | 13 (20.3%) |
|              | Neg (%)                  | 11 (36.0%)   | 10 (31.0%) | 4 (40.0%)  | 23 (35.9%) |
|              | Gen (%)                  | 15 (52.0%)   | 7 (44.8%)  | 4 (40.0%)  | 18 (28.1%) |

298

299 Significant results = positive significant results; % = proportion of studies with positive significant  
 300 results. The number of studies slightly differ from that reported in Table 1, as double arm studies  
 301 were rated twice in case of discrepant results between arms. Also, Peet et al. 2001 study[62] was  
 302 conducted both in UK and in India and was thus reported twice.  
 303

304 Details of the studies with low risk of bias  
 305

| Agent       | High income countries (k=12)<br>Australia, Norway, Poland, South Korea,<br>Spain, Switzerland, UK, USA                  | Upper middle income countries (k=12)<br>Iran, Romania, South Africa, China                                                                                            |
|-------------|-------------------------------------------------------------------------------------------------------------------------|-----------------------------------------------------------------------------------------------------------------------------------------------------------------------|
| NAC         | <i>Augmentation</i><br>Conus et al., 2018 (ns/ns/ns)<br>early schizophrenia                                             | <i>Augmentation</i><br>Sepehrmanesh et al., 2018 (+/+/<br>chronic schizophrenia<br><i>Co-initiation</i><br>Farokhnia et al., 2013 (ns/+/<br>acute schizophrenia       |
| PUFA        | <i>Augmentation</i><br>Peet et al., 2002 (ns/ns/ns)<br>Pawelczyk et al., 2016 (ns/ns/<br>Bentsen et al., 2013 (+/ns/ns) | <i>Augmentation</i><br>Emsley et al., 2002 (ns/ns/<br>Emsley et al., 2006 (ns)                                                                                        |
| Estrogens   | <i>Augmentation</i><br>Ko et al., 2006 (NA/+/<br>Kulkarni et al., 2008 (+/ns/<br>Kulkarni et al., 2014 (+/ns/+)         | <i>Augmentation</i><br>Weiser et al., 2019 (+/+/<br><i>Co-initiation</i><br>Akhondzadeh et al., 2003 (+/+/<br>                                                        |
| Minocycline | <i>Augmentation</i><br>Deakin et al., 2018 (ns/ns/ns)<br>Kelly et al., 2015 (ns/ns/ns)                                  | <i>Augmentation</i><br>Khodaie-Ardakani et al., 2014 (ns/+/<br><br><i>Co-initiation</i><br>Zhang et al. (2018)) (ns/+/<br>                                            |
| SERM        | <i>Augmentation</i><br>Usall et al., 2011 (+/+/<br>Weickert et al., 2015 (ns/ns/<br>Kulkarni et al. 2016 (ns/ns/+)      | <i>Augmentation</i><br>Weiser et al., 2017 (-/-/<br>Vahdani et al., 2020 (+,ns for cognition)<br><br><i>Co-initiation</i><br>Khodaie-Ardakani et al., 2015 (ns/+/<br> |
| Celecoxib   |                                                                                                                         | Akhondzadeh et al., 2007                                                                                                                                              |

306  
 307 **Note:** (positive/negative/general psychopathology). + = positive significant result; ns = non  
 308 significant result; - negative significant result.  
 309

310

311 **Supplementary material 10.**      [References for supplementary material](#)

312

313 1 ClinicalTrials.gov. 2022.<https://clinicaltrials.gov/> (accessed 4 Sep 2022).  
 314 2 EU Clinical Trials Register. 2022.<https://www.clinicaltrialsregister.eu/ctr-search/search>  
 315 (accessed 4 Sep 2022).  
 316 3 Hasan A, Bandelow B, Yatham LN, *et al.* WFSBP guidelines on how to grade treatment  
 317 evidence for clinical guideline development. *The World Journal of Biological Psychiatry*  
 318 2019;**20**:2–16. doi:10.1080/15622975.2018.1557346  
 319 4 Zhang L, Zheng H, Wu R, *et al.* Minocycline adjunctive treatment to risperidone for  
 320 negative symptoms in schizophrenia: Association with pro-inflammatory cytokine levels.  
 321 *Progress in Neuro-Psychopharmacology and Biological Psychiatry* 2018;**85**:69–76.  
 322 doi:10.1016/j.pnpbp.2018.04.004  
 323 5 Strzelecki D, Podgórski M, Kałużńska O, *et al.* Adding Sarcosine to Antipsychotic  
 324 Treatment in Patients with Stable Schizophrenia Changes the Concentrations of Neuronal and  
 325 Glial Metabolites in the Left Dorsolateral Prefrontal Cortex. *Int J Mol Sci* 2015;**16**:24475–89.  
 326 doi:10.3390/ijms161024475  
 327 6 Panagiotou OA, Contopoulos-Ioannidis DG, Ioannidis JPA. Comparative effect sizes in

- 328 randomised trials from less developed and more developed countries: meta-epidemiological  
 329 assessment. *BMJ* 2013;**346**:f707. doi:10.1136/bmj.f707
- 330 7 World Bank. World Economic Situation and Prospects.  
 331 2014.[https://www.un.org/en/development/desa/policy/wesp/wesp\\_current/2014wesp\\_country\\_classification.pdf](https://www.un.org/en/development/desa/policy/wesp/wesp_current/2014wesp_country_classification.pdf) (accessed 1 Jul 2023).
- 332  
 333 8 SIGN. Checklists. SIGN. 2022.<https://testing36.scot.nhs.uk> (accessed 13 Aug 2022).
- 334 9 BMJ Best practice. What is GRADE?  
 335 2022.<https://bestpractice.bmj.com/info/toolkit/learn-ebm/what-is-grade/> (accessed 29 Jul 2022).
- 336 10 Andrews JC, Schünemann HJ, Oxman AD, *et al.* GRADE guidelines: 15. Going from  
 337 evidence to recommendation—determinants of a recommendation’s direction and strength.  
 338 *Journal of Clinical Epidemiology* 2013;**66**:726–35. doi:10.1016/j.jclinepi.2013.02.003
- 339 11 Zheng W, Zhang Q-E, Cai D-B, *et al.* N-acetylcysteine for major mental disorders: a  
 340 systematic review and meta-analysis of randomized controlled trials. *Acta Psychiatr Scand*  
 341 2018;**137**:391–400. doi:10.1111/acps.12862
- 342 12 Sommer IE, de Witte L, Begemann M, *et al.* Nonsteroidal anti-inflammatory drugs in  
 343 schizophrenia: ready for practice or a good start? A meta-analysis. *J Clin Psychiatry*  
 344 2012;**73**:414–9. doi:10.4088/JCP.10r06823
- 345 13 Jeppesen R, Christensen RHB, Pedersen EMJ, *et al.* Efficacy and safety of anti-  
 346 inflammatory agents in treatment of psychotic disorders - A comprehensive systematic review  
 347 and meta-analysis. *Brain Behav Immun* 2020;**90**:364–80. doi:10.1016/j.bbi.2020.08.028
- 348 14 Çakici N, van Beveren NJM, Judge-Hundal G, *et al.* An update on the efficacy of anti-  
 349 inflammatory agents for patients with schizophrenia: a meta-analysis. *Psychol Med*  
 350 2019;**49**:2307–19. doi:10.1017/S0033291719001995
- 351 15 Cho M, Lee TY, Kwak YB, *et al.* Adjunctive use of anti-inflammatory drugs for  
 352 schizophrenia: A meta-analytic investigation of randomized controlled trials. *Aust N Z J*  
 353 *Psychiatry* 2019;:4867419835028. doi:10.1177/0004867419835028
- 354 16 Yolland CO, Hanratty D, Neill E, *et al.* Meta-analysis of randomised controlled trials with  
 355 N-acetylcysteine in the treatment of schizophrenia. *Aust N Z J Psychiatry* 2020;**54**:453–66.  
 356 doi:10.1177/0004867419893439
- 357 17 Chang C-H, Lane H-Y, Tseng P-T, *et al.* Effect of N-methyl-D-aspartate-receptor-  
 358 enhancing agents on cognition in patients with schizophrenia: A systematic review and meta-  
 359 analysis of double-blind randomised controlled trials. *J Psychopharmacol* 2019;**33**:436–48.  
 360 doi:10.1177/0269881118822157
- 361 18 Magalhães PVS, Dean O, Andreazza AC, *et al.* Antioxidant treatments for schizophrenia.  
 362 *Cochrane Database Syst Rev* 2016;**2**:CD008919. doi:10.1002/14651858.CD008919.pub2
- 363 19 Berk M, Copolov D, Dean O, *et al.* N-acetyl cysteine as a glutathione precursor for  
 364 schizophrenia--a double-blind, randomized, placebo-controlled trial. *Biol Psychiatry*  
 365 2008;**64**:361–8. doi:10.1016/j.biopsych.2008.03.004
- 366 20 Breier A, Liffick E, Hummer TA, *et al.* Effects of 12-month, double-blind N-acetyl  
 367 cysteine on symptoms, cognition and brain morphology in early phase schizophrenia spectrum  
 368 disorders. *Schizophrenia Research* 2018;**199**:395–402. doi:10.1016/j.schres.2018.03.012
- 369 21 Conus P, Seidman LJ, Fournier M, *et al.* N-acetylcysteine in a Double-Blind Randomized  
 370 Placebo-Controlled Trial: Toward Biomarker-Guided Treatment in Early Psychosis. *Schizophr*  
 371 *Bull* 2018;**44**:317–27. doi:10.1093/schbul/sbx093
- 372 22 Davis M, Wynn J, Weiner K, *et al.* Randomized controlled trial of N-acetylcysteine for  
 373 cognition and EEG correlates in schizophrenia. In: *Neuropsychopharmacology*. 2014. S363–  
 374 S363.
- 375 23 Farokhnia M, Azarkolah A, Adinehfar F, *et al.* N-Acetylcysteine as an Adjunct to  
 376 Risperidone for Treatment of Negative Symptoms in Patients With Chronic Schizophrenia: A  
 377 Randomized, Double-Blind, Placebo-Controlled Study. *Clinical Neuropharmacology*  
 378 2013;**36**:185–92. doi:10.1097/WNF.0000000000000001
- 379 24 Rapado-Castro M, Dodd S, Bush AI, *et al.* Cognitive effects of adjunctive N -acetyl  
 380 cysteine in psychosis. *Psychol Med* 2017;**47**:866–76. doi:10.1017/S0033291716002932
- 381 25 Sepehrmanesh Z, Heidary M, Akasheh N, *et al.* Therapeutic effect of adjunctive N-acetyl  
 382 cysteine (NAC) on symptoms of chronic schizophrenia: A double-blind, randomized clinical trial.  
 383 *Progress in Neuro-Psychopharmacology and Biological Psychiatry* 2018;**82**:289–96.  
 384 doi:10.1016/j.pnpbp.2017.11.001
- 385 26 Zhang J, Chen B, Lu J. Treatment effect of risperidone alone and combined with N-  
 386 acetyl-cysteine for first-episode schizophrenic patients. *J Clin Psychiatry* 2015;**1005**:394–6.
- 387 27 Tsai GE, Lin P-Y. Strategies to enhance N-methyl-D-aspartate receptor-mediated

- 388 neurotransmission in schizophrenia, a critical review and meta-analysis. *Curr Pharm Des*  
389 2010;**16**:522–37. doi:10.2174/138161210790361452
- 390 28 Singh SP, Singh V. Meta-analysis of the efficacy of adjunctive NMDA receptor  
391 modulators in chronic schizophrenia. *CNS Drugs* 2011;**25**:859–85. doi:10.2165/11586650-  
392 000000000-00000
- 393 29 Chang C-H, Lin C-H, Liu C-Y, *et al.* Efficacy and cognitive effect of sarcosine (N-  
394 methylglycine) in patients with schizophrenia: A systematic review and meta-analysis of double-  
395 blind randomised controlled trials. *J Psychopharmacol* 2020;**34**:495–505.  
396 doi:10.1177/0269881120908016
- 397 30 Goh KK, Wu T-H, Chen C-H, *et al.* Efficacy of N-methyl-D-aspartate receptor modulator  
398 augmentation in schizophrenia: A meta-analysis of randomised, placebo-controlled trials. *J*  
399 *Psychopharmacol* 2021;**35**:236–52. doi:10.1177/0269881120965937
- 400 31 Marchi M, Galli G, Magarini FM, *et al.* Sarcosine as an add-on treatment to antipsychotic  
401 medication for people with schizophrenia: a systematic review and meta-analysis of randomized  
402 controlled trials. *Expert Opin Drug Metab Toxicol* 2021;**17**:483–93.  
403 doi:10.1080/17425255.2021.1885648
- 404 32 Lane H-Y, Lin C-H, Huang Y-J, *et al.* A randomized, double-blind, placebo-controlled  
405 comparison study of sarcosine (N-methylglycine) and D-serine add-on treatment for  
406 schizophrenia. *Int J Neuropsychopharmacol* 2010;**13**:451–60. doi:10.1017/S1461145709990939
- 407 33 Lane H-Y, Huang C-L, Wu P-L, *et al.* Glycine transporter I inhibitor, N-methylglycine  
408 (sarcosine), added to clozapine for the treatment of schizophrenia. *Biol Psychiatry* 2006;**60**:645–  
409 9. doi:10.1016/j.biopsych.2006.04.005
- 410 34 Lane H-Y, Chang Y-C, Liu Y-C, *et al.* Sarcosine or D-serine add-on treatment for acute  
411 exacerbation of schizophrenia: a randomized, double-blind, placebo-controlled study. *Arch Gen*  
412 *Psychiatry* 2005;**62**:1196–204. doi:10.1001/archpsyc.62.11.1196
- 413 35 Lin C-Y, Liang S-Y, Chang Y-C, *et al.* Adjunctive sarcosine plus benzoate improved  
414 cognitive function in chronic schizophrenia patients with constant clinical symptoms: A  
415 randomised, double-blind, placebo-controlled trial. *World J Biol Psychiatry* 2017;**18**:357–68.  
416 doi:10.3109/15622975.2015.1117654
- 417 36 Tsai G, Lane H-Y, Yang P, *et al.* Glycine transporter I inhibitor, N-methylglycine  
418 (sarcosine), added to antipsychotics for the treatment of schizophrenia. *Biol Psychiatry*  
419 2004;**55**:452–6. doi:10.1016/j.biopsych.2003.09.012
- 420 37 Oya K, Kishi T, Iwata N. Efficacy and tolerability of minocycline augmentation therapy  
421 in schizophrenia: a systematic review and meta-analysis of randomized controlled trials. *Hum*  
422 *Psychopharmacol* 2014;**29**:483–91. doi:10.1002/hup.2426
- 423 38 Sommer IE, van Westrhenen R, Begemann MJH, *et al.* Efficacy of anti-inflammatory  
424 agents to improve symptoms in patients with schizophrenia: an update. *Schizophr Bull*  
425 2014;**40**:181–91. doi:10.1093/schbul/sbt139
- 426 39 Solmi M, Veronese N, Thapa N, *et al.* Systematic review and meta-analysis of the  
427 efficacy and safety of minocycline in schizophrenia. *CNS Spectr* 2017;**22**:415–26.  
428 doi:10.1017/S1092852916000638
- 429 40 Xiang Y-Q, Zheng W, Wang S-B, *et al.* Adjunctive minocycline for schizophrenia: A  
430 meta-analysis of randomized controlled trials. *Eur Neuropsychopharmacol* 2017;**27**:8–18.  
431 doi:10.1016/j.euroneuro.2016.11.012
- 432 41 Zheng W, Zhu X-M, Zhang Q-E, *et al.* Adjunctive minocycline for major mental  
433 disorders: A systematic review. *J Psychopharmacol* 2019;**33**:1215–26.  
434 doi:10.1177/0269881119858286
- 435 42 Khodaie-Ardakani M-R, Mirshafiee O, Farokhnia M, *et al.* Minocycline add-on to  
436 risperidone for treatment of negative symptoms in patients with stable schizophrenia:  
437 Randomized double-blind placebo-controlled study. *Psychiatry Research* 2014;**215**:540–6.  
438 doi:10.1016/j.psychres.2013.12.051
- 439 43 Kelly DL, Sullivan KM, McEvoy JP, *et al.* Adjunctive Minocycline in Clozapine-Treated  
440 Schizophrenia Patients With Persistent Symptoms. *Journal of Clinical Psychopharmacology*  
441 2015;**35**:374–81. doi:10.1097/JCP.0000000000000345
- 442 44 Weiser M, Levi L, Burshtein S, *et al.* The effect of minocycline on symptoms in  
443 schizophrenia: Results from a randomized controlled trial. *Schizophrenia Research*  
444 2019;**206**:325–32. doi:10.1016/j.schres.2018.10.023
- 445 45 Chaudhry IB, Hallak J, Husain N, *et al.* Minocycline benefits negative symptoms in early  
446 schizophrenia: a randomised double-blind placebo-controlled clinical trial in patients on standard  
447 treatment. *J Psychopharmacol* 2012;**26**:1185–93. doi:10.1177/0269881112444941

- 448 46 Liu F, Guo X, Wu R, *et al.* Minocycline supplementation for treatment of negative  
449 symptoms in early-phase schizophrenia: A double blind, randomized, controlled trial.  
450 *Schizophrenia Research* 2014;**153**:169–76. doi:10.1016/j.schres.2014.01.011
- 451 47 Levkovitz Y, Mendlovich S, Riwkes S, *et al.* A Double-Blind, Randomized Study of  
452 Minocycline for the Treatment of Negative and Cognitive Symptoms in Early-Phase  
453 Schizophrenia. *J Clin Psychiatry* 2010;**71**:138–49. doi:10.4088/JCP.08m04666yel
- 454 48 Deakin B, Suckling J, Barnes TRE, *et al.* The benefit of minocycline on negative  
455 symptoms of schizophrenia in patients with recent-onset psychosis (BeneMin): a randomised,  
456 double-blind, placebo-controlled trial. *The Lancet Psychiatry* 2018;**5**:885–94.  
457 doi:10.1016/S2215-0366(18)30345-6
- 458 49 Goh KK, Chen CY-A, Chen C-H, *et al.* Effects of omega-3 polyunsaturated fatty acids  
459 supplements on psychopathology and metabolic parameters in schizophrenia: A meta-analysis of  
460 randomized controlled trials. *J Psychopharmacol* 2021;**35**:221–35.  
461 doi:10.1177/0269881120981392
- 462 50 Fusar-Poli P, Berger G. Eicosapentaenoic acid interventions in schizophrenia: meta-  
463 analysis of randomized, placebo-controlled studies. *J Clin Psychopharmacol* 2012;**32**:179–85.  
464 doi:10.1097/JCP.0b013e318248b7bb
- 465 51 Chen AT, Chibnall JT, Nasrallah HA. A meta-analysis of placebo-controlled trials of  
466 omega-3 fatty acid augmentation in schizophrenia: Possible stage-specific effects. *Ann Clin*  
467 *Psychiatry* 2015;**27**:289–96.
- 468 52 Joy CB, Mumby-Croft R, Joy LA. Polyunsaturated fatty acid supplementation for  
469 schizophrenia. *Cochrane Database Syst Rev* 2006;:CD001257.  
470 doi:10.1002/14651858.CD001257.pub2
- 471 53 Emsley R, Chiliza B, Asmal L, *et al.* A randomized, controlled trial of omega-3 fatty  
472 acids plus an antioxidant for relapse prevention after antipsychotic discontinuation in first-  
473 episode schizophrenia. *Schizophrenia Research* 2014;**158**:230–5.  
474 doi:10.1016/j.schres.2014.06.004
- 475 54 Qiao Y, Mei Y, Han H, *et al.* Effects of Omega-3 in the treatment of violent schizophrenia  
476 patients. *Schizophrenia Research* 2018;**195**:283–5. doi:10.1016/j.schres.2017.08.026
- 477 55 Jamilian H, Solhi H, Jamilian M. Randomized, placebo-controlled clinical trial of omega-  
478 3 as supplemental treatment in schizophrenia. *Glob J Health Sci* 2014;**6**:103–8.  
479 doi:10.5539/gjhs.v6n7p103
- 480 56 Manteghiy A, Shakeri MT, Koohestani L, *et al.* Beneficial Antipsychotic Effects of  
481 Omega-3 Fatty Acids Add-On Therapy for the Pharmacological Management of Patients With  
482 Schizophrenia. *Iran J Psychiatry Behav Sci* 2008;**2**:35–40.
- 483 57 Bentsen H, Osnes K, Refsum H, *et al.* A randomized placebo-controlled trial of an  
484 omega-3 fatty acid and vitamins E+C in schizophrenia. *Transl Psychiatry* 2013;**3**:e335.  
485 doi:10.1038/tp.2013.110
- 486 58 Szeszko PR, McNamara RK, Gallego JA, *et al.* Longitudinal investigation of the  
487 relationship between omega-3 polyunsaturated fatty acids and neuropsychological functioning in  
488 recent-onset psychosis: A randomized clinical trial. *Schizophrenia Research* 2021;**228**:180–7.  
489 doi:10.1016/j.schres.2020.11.050
- 490 59 Robinson DG, Gallego JA, John M, *et al.* A potential role for adjunctive omega-3  
491 polyunsaturated fatty acids for depression and anxiety symptoms in recent onset psychosis:  
492 Results from a 16 week randomized placebo-controlled trial for participants concurrently treated  
493 with risperidone. *Schizophr Res* 2019;**204**:295–303. doi:10.1016/j.schres.2018.09.006
- 494 60 Pawełczyk T, Grancow-Grabka M, Kotlicka-Antczak M, *et al.* A randomized controlled  
495 study of the efficacy of six-month supplementation with concentrated fish oil rich in omega-3  
496 polyunsaturated fatty acids in first episode schizophrenia. *Journal of Psychiatric Research*  
497 2016;**73**:34–44. doi:10.1016/j.jpsychires.2015.11.013
- 498 61 Emsley R, Niehaus DJH, Koen L, *et al.* The effects of eicosapentaenoic acid in tardive  
499 dyskinesia: a randomized, placebo-controlled trial. *Schizophr Res* 2006;**84**:112–20.  
500 doi:10.1016/j.schres.2006.03.023
- 501 62 Peet M, Brind J, Ramchand CN, *et al.* Two double-blind placebo-controlled pilot studies  
502 of eicosapentaenoic acid in the treatment of schizophrenia. *Schizophr Res* 2001;**49**:243–51.  
503 doi:10.1016/s0920-9964(00)00083-9
- 504 63 Fenton WS, Dickerson F, Boronow J, *et al.* A placebo-controlled trial of omega-3 fatty  
505 acid (ethyl eicosapentaenoic acid) supplementation for residual symptoms and cognitive  
506 impairment in schizophrenia. *Am J Psychiatry* 2001;**158**:2071–4.  
507 doi:10.1176/appi.158.12.2071

- 508 64 Emsley R, Myburgh C, Oosthuizen P, *et al.* Randomized, placebo-controlled study of  
509 ethyl-eicosapentaenoic acid as supplemental treatment in schizophrenia. *Am J Psychiatry*  
510 2002;**159**:1596–8. doi:10.1176/appi.ajp.159.9.1596
- 511 65 Bošković M, Vovk T, Koprivšek J, *et al.* Vitamin E and essential polyunsaturated fatty  
512 acids supplementation in schizophrenia patients treated with haloperidol. *Nutr Neurosci*  
513 2016;**19**:156–61. doi:10.1179/1476830514Y.0000000139
- 514 66 Peet M, Horrobin DF, E-E Multicentre Study Group. A dose-ranging exploratory study of  
515 the effects of ethyl-eicosapentaenoate in patients with persistent schizophrenic symptoms. *J*  
516 *Psychiatr Res* 2002;**36**:7–18. doi:10.1016/s0022-3956(01)00048-6
- 517 67 Berger GE, Proffitt T-M, McConchie M, *et al.* Ethyl-eicosapentaenoic acid in first-  
518 episode psychosis: a randomized, placebo-controlled trial. *J Clin Psychiatry* 2007;**68**:1867–75.  
519 doi:10.4088/jcp.v68n1206
- 520 68 Nitta M, Kishimoto T, Müller N, *et al.* Adjunctive use of nonsteroidal anti-inflammatory  
521 drugs for schizophrenia: a meta-analytic investigation of randomized controlled trials. *Schizophr*  
522 *Bull* 2013;**39**:1230–41. doi:10.1093/schbul/sbt070
- 523 69 Sommer I, Griebler U, Kien C, *et al.* Vitamin D deficiency as a risk factor for dementia: a  
524 systematic review and meta-analysis. *BMC Geriatr* 2017;**17**:16. doi:10.1186/s12877-016-0405-0
- 525 70 Weiser M, Zamora D, Levi L, *et al.* Adjunctive Aspirin vs Placebo in Patients With  
526 Schizophrenia: Results of Two Randomized Controlled Trials. *Schizophr Bull* 2021;**47**:1077–87.  
527 doi:10.1093/schbul/sbaa198
- 528 71 Laan W, Grobbee DE, Selten J-P, *et al.* Adjuvant aspirin therapy reduces symptoms of  
529 schizophrenia spectrum disorders: results from a randomized, double-blind, placebo-controlled  
530 trial. *J Clin Psychiatry* 2010;**71**:520–7. doi:10.4088/JCP.09m05117yel
- 531 72 Attari A, Asefeh M, Sadat KSFA, *et al.* Aspirin Inclusion In Antipsychotic Treatment On  
532 Severity Of Symptoms In Schizophrenia: A Randomized Clinical Trial. 2017;**11**:1–9.
- 533 73 Zheng W, Cai D-B, Yang X-H, *et al.* Adjunctive celecoxib for schizophrenia: A meta-  
534 analysis of randomized, double-blind, placebo-controlled trials. *J Psychiatr Res* 2017;**92**:139–46.  
535 doi:10.1016/j.jpsychires.2017.04.004
- 536 74 Akhondzadeh S, Tabatabaee M, Amini H, *et al.* Celecoxib as adjunctive therapy in  
537 schizophrenia: A double-blind, randomized and placebo-controlled trial. *Schizophrenia Research*  
538 2007;**90**:179–85. doi:10.1016/j.schres.2006.11.016
- 539 75 Müller N, Krause D, Dehning S, *et al.* Celecoxib treatment in an early stage of  
540 schizophrenia: Results of a randomized, double-blind, placebo-controlled trial of celecoxib  
541 augmentation of amisulpride treatment. *Schizophrenia Research* 2010;**121**:118–24.  
542 doi:10.1016/j.schres.2010.04.015
- 543 76 Müller N, Riedel M, Scheppach C, *et al.* Beneficial Antipsychotic Effects of Celecoxib  
544 Add-On Therapy Compared to Risperidone Alone in Schizophrenia. *AJP* 2002;**159**:1029–34.  
545 doi:10.1176/appi.ajp.159.6.1029
- 546 77 Rapaport MH, Delrahim KK, Bresee CJ, *et al.* Celecoxib Augmentation of Continuously  
547 Ill Patients with Schizophrenia. *Biological Psychiatry* 2005;**57**:1594–6.  
548 doi:10.1016/j.biopsych.2005.02.024
- 549 78 Rappard F, Müller N. Celecoxib add-on therapy does not have beneficial antipsychotic  
550 effects over risperidone alone in schizophrenia. In: *Neuropsychopharmacology*. NATURE  
551 PUBLISHING GROUP MACMILLAN BUILDING, 4 CRINAN ST, LONDON N1 9XW,  
552 ENGLAND 2004. S222–S222.
- 553 79 Chen DC, Zhang XY, Li YL, *et al.* Adjunctive celecoxib treatment with risperidone in  
554 first-episode schizophrenia: A double blind, randomized and placebo controlled trial. China. *Chin*  
555 *J Psychiatry* 2008;**41**:160–4.
- 556 80 Nie Y, Chen D, Zhang X, *et al.* Adjunctive celecoxib treatment with clozapine in chronic  
557 refractory schizophrenia: a double blind, randomized and placebo controlled trial. *Sichuan*  
558 *Mental Health* 2008.
- 559 81 Begemann MJH, Dekker CF, van Lunenburg M, *et al.* Estrogen augmentation in  
560 schizophrenia: a quantitative review of current evidence. *Schizophr Res* 2012;**141**:179–84.  
561 doi:10.1016/j.schres.2012.08.016
- 562 82 Kulkarni J, Gavrilidis E, Wang W, *et al.* Estradiol for treatment-resistant schizophrenia: a  
563 large-scale randomized-controlled trial in women of child-bearing age. *Mol Psychiatry*  
564 2015;**20**:695–702. doi:10.1038/mp.2014.33
- 565 83 Weiser M, Levi L, Zamora D, *et al.* Effect of Adjunctive Estradiol on Schizophrenia  
566 Among Women of Childbearing Age: A Randomized Clinical Trial. *JAMA Psychiatry*  
567 2019;**76**:1009–17. doi:10.1001/jamapsychiatry.2019.1842

- 568 84 Louzā MR, Marques AP, Elkis H, *et al.* Conjugated estrogens as adjuvant therapy in the  
569 treatment of acute schizophrenia: a double-blind study. *Schizophr Res* 2004;**66**:97–100.  
570 doi:10.1016/S0920-9964(03)00082-3
- 571 85 Kulkarni J, Riedel A, de Castella AR, *et al.* Estrogen - a potential treatment for  
572 schizophrenia. *Schizophr Res* 2001;**48**:137–44. doi:10.1016/s0920-9964(00)00088-8
- 573 86 Kulkarni J, de Castella A, Fitzgerald PB, *et al.* Estrogen in severe mental illness: a  
574 potential new treatment approach. *Arch Gen Psychiatry* 2008;**65**:955–60.  
575 doi:10.1001/archpsyc.65.8.955
- 576 87 Kulkarni J, de Castella A, Headey B, *et al.* Estrogens and men with schizophrenia: Is there  
577 a case for adjunctive therapy? *Schizophrenia Research* 2011;**125**:278–83.  
578 doi:10.1016/j.schres.2010.10.009
- 579 88 Ko Y-H, Joe S-H, Cho W, *et al.* Effect of hormone replacement therapy on cognitive  
580 function in women with chronic schizophrenia. *Int J Psychiatry Clin Pract* 2006;**10**:97–104.  
581 doi:10.1080/13651500500526235
- 582 89 Ghafari E, Fararouie M, Shirazi HG, *et al.* Combination of estrogen and antipsychotics in  
583 the treatment of women with chronic schizophrenia: a double-blind, randomized, placebo-  
584 controlled clinical trial. *Clin Schizophr Relat Psychoses* 2013;**6**:172–6.  
585 doi:10.3371/CSRP.GHFA.01062013
- 586 90 Akhondzadeh S, Nejatiasafa AA, Amini H, *et al.* Adjunctive estrogen treatment in women  
587 with chronic schizophrenia: a double-blind, randomized, and placebo-controlled trial. *Prog*  
588 *Neuropsychopharmacol Biol Psychiatry* 2003;**27**:1007–12. doi:10.1016/S0278-5846(03)00161-1
- 589 91 de Boer J, Prikken M, Lei WU, *et al.* The effect of raloxifene augmentation in men and  
590 women with a schizophrenia spectrum disorder: a systematic review and meta-analysis. *NPJ*  
591 *Schizophr* 2018;**4**:1. doi:10.1038/s41537-017-0043-3
- 592 92 Wang Q, Dong X, Wang Y, *et al.* Raloxifene as an adjunctive treatment for  
593 postmenopausal women with schizophrenia: a meta-analysis of randomized controlled trials.  
594 *Arch Womens Ment Health* 2018;**21**:31–41. doi:10.1007/s00737-017-0773-2
- 595 93 Zhu X-M, Zheng W, Li X-H, *et al.* Adjunctive raloxifene for postmenopausal women  
596 with schizophrenia: A meta-analysis of randomized, double-blind, placebo-controlled trials.  
597 *Schizophr Res* 2018;**197**:288–93. doi:10.1016/j.schres.2018.01.017
- 598 94 Khodaie-Ardakani M-R, Khosravi M, Zarinfard R, *et al.* A Placebo-Controlled Study of  
599 Raloxifene Added to Risperidone in Men with Chronic Schizophrenia. 2015;;9.
- 600 95 Kianimehr G, Fatehi F, Hashempoor S, *et al.* Raloxifene adjunctive therapy for  
601 postmenopausal women suffering from chronic schizophrenia: a randomized double-blind and  
602 placebo controlled trial. *DARU J Pharm Sci* 2014;**22**:55. doi:10.1186/2008-2231-22-55
- 603 96 Kulkarni J, Gavrilidis E, Gwini SM, *et al.* Effect of Adjunctive Raloxifene Therapy on  
604 Severity of Refractory Schizophrenia in Women: A Randomized Clinical Trial. *JAMA Psychiatry*  
605 2016;**73**:947. doi:10.1001/jamapsychiatry.2016.1383
- 606 97 Kulkarni J, Gurvich C, Lee SJ, *et al.* Piloting the effective therapeutic dose of adjunctive  
607 selective estrogen receptor modulator treatment in postmenopausal women with schizophrenia.  
608 *Psychoneuroendocrinology* 2010;**35**:1142–7. doi:10.1016/j.psyneuen.2010.01.014
- 609 98 Usall J, Huerta-Ramos E, Labad J, *et al.* Raloxifene as an Adjunctive Treatment for  
610 Postmenopausal Women With Schizophrenia: A 24-Week Double-Blind, Randomized, Parallel,  
611 Placebo-Controlled Trial. *SCHBUL* 2016;**42**:309–17. doi:10.1093/schbul/sbv149
- 612 99 Usall J, Huerta-Ramos E, Iniesta R, *et al.* Raloxifene as an Adjunctive Treatment for  
613 Postmenopausal Women With Schizophrenia: A Double-Blind, Randomized, Placebo-Controlled  
614 Trial. *J Clin Psychiatry* 2011;**72**:1552–7. doi:10.4088/JCP.10m06610
- 615 100 Weickert TW, Weinberg D, Lenroot R, *et al.* Adjunctive raloxifene treatment improves  
616 attention and memory in men and women with schizophrenia. *Mol Psychiatry* 2015;**20**:685–94.  
617 doi:10.1038/mp.2015.11
- 618 101 Weiser M, Levi L, Burshtein S, *et al.* Raloxifene Plus Antipsychotics Versus Placebo Plus  
619 Antipsychotics in Severely Ill Decompensated Postmenopausal Women With Schizophrenia or  
620 Schizoaffective Disorder: A Randomized Controlled Trial. *J Clin Psychiatry* 2017;**78**:e758–65.  
621 doi:10.4088/JCP.15m10498
- 622 102 Gurvich C, Hudaib A, Gavrilidis E, *et al.* Raloxifene as a treatment for cognition in  
623 women with schizophrenia: the influence of menopause status. *Psychoneuroendocrinology*  
624 2019;**100**:113–9. doi:10.1016/j.psyneuen.2018.10.001
- 625 103 Huerta-Ramos E, Labad J, Cobo J, *et al.* Effects of raloxifene on cognition in  
626 postmenopausal women with schizophrenia: a 24-week double-blind, randomized, parallel,  
627 placebo-controlled trial. *Eur Arch Psychiatry Clin Neurosci* 2020;**270**:729–37.

- 628 doi:10.1007/s00406-019-01079-w  
629 104 Vahdani B, Armani Kian A, Esmailzadeh A, *et al.* Adjunctive Raloxifene and Isradipine  
630 Improve Cognitive Functioning in Patients With Schizophrenia: A Pilot Study. *J Clin*  
631 *Psychopharmacol* 2020;**40**:457–63. doi:10.1097/JCP.0000000000001274  
632 105 Samuni Y, Goldstein S, Dean OM, *et al.* The chemistry and biological activities of N-  
633 acetylcysteine. *Biochimica et Biophysica Acta (BBA) - General Subjects* 2013;**1830**:4117–29.  
634 doi:10.1016/j.bbagen.2013.04.016  
635 106 Marchi M, Galli G, Magarini FM, *et al.* Sarcosine as an add-on treatment to antipsychotic  
636 medication for people with schizophrenia: a systematic review and meta-analysis of randomized  
637 controlled trials. *Expert Opinion on Drug Metabolism & Toxicology* 2021;**17**:483–93.  
638 doi:10.1080/17425255.2021.1885648  
639 107 Zheng W, Zhu X-M, Zhang Q-E, *et al.* Adjunctive minocycline for major mental  
640 disorders: A systematic review. *J Psychopharmacol* 2019;**33**:1215–26.  
641 doi:10.1177/0269881119858286  
642 108 Jones HJ, Borges MC, Carnegie R, *et al.* Associations between plasma fatty acid  
643 concentrations and schizophrenia: a two-sample Mendelian randomisation study. *Lancet*  
644 *Psychiatry* 2021;**8**:1062–70. doi:10.1016/S2215-0366(21)00286-8  
645 109 McLaverty A, Allott KA, Berger M, *et al.* Omega-3 fatty acids and neurocognitive ability  
646 in young people at ultra-high risk for psychosis. *Early Interv Psychiatry* 2021;**15**:874–81.  
647 doi:10.1111/eip.13025  
648 110 Benros ME, Mortensen PB. Role of Infection, Autoimmunity, Atopic Disorders, and the  
649 Immune System in Schizophrenia: Evidence from Epidemiological and Genetic Studies. *Curr*  
650 *Top Behav Neurosci* 2020;**44**:141–59. doi:10.1007/7854\_2019\_93  
651 111 Howes OD, McCutcheon R. Inflammation and the neural diathesis-stress hypothesis of  
652 schizophrenia: a reconceptualization. *Transl Psychiatry* 2017;**7**:e1024. doi:10.1038/tp.2016.278  
653 112 Müller N, Ulmschneider M, Scheppach C, *et al.* COX-2 inhibition as a treatment approach  
654 in schizophrenia: Immunological considerations and clinical effects of celecoxib add-on therapy.  
655 *European Archives of Psychiatry and Clinical Neuroscience* 2004;**254**:14–22.  
656 doi:10.1007/s00406-004-0478-1  
657 113 Gerber AR, Bale TL. Antiinflammatory treatment ameliorates HPA stress axis  
658 dysfunction in a mouse model of stress sensitivity. *Endocrinology* 2012;**153**:4830–7.  
659 doi:10.1210/en.2012-1601  
660 114 Kumar JSD, Bai B, Zanderigo F, *et al.* In Vivo Brain Imaging, Biodistribution, and  
661 Radiation Dosimetry Estimation of [<sup>11</sup>C]Celecoxib, a COX-2 PET Ligand, in Nonhuman  
662 Primates. *Molecules* 2018;**23**:1929. doi:10.3390/molecules23081929  
663 115 de Boer J, Prikken M, Lei WU, *et al.* The effect of raloxifene augmentation in men and  
664 women with a schizophrenia spectrum disorder: a systematic review and meta-analysis. *NPJ*  
665 *Schizophr* 2018;**4**:1. doi:10.1038/s41537-017-0043-3  
666  
667
