# Supplementary material for: Adjunctive agents to antipsychotics in schizophrenia: a systematic umbrella review and recommendations for amino acids, hormonal therapies and anti-inflammatory drugs
Source: HighWire-hosted journal article supplement (doi:10.1136/bmjment-2023-300771), 2023-10-01
Supplement: bmjment-2023-300771supp002_data_supplement.pdf [file bmjment-2023-300771supp002_data_supplement.pdf]

## Résumé

**Question.** La présente *umbrella review* avait pour objectif de fournir des preuves à l'appui du choix rationnel de thérapies d'appoint non psychopharmacologiques sélectionnées pour la schizophrénie.

**Sélection et analyse des études.** Conformément aux recommandations PRISMA et le système de grade de la WSFBP, 63 essais contrôlés randomisés (ECR) (dont 4 219 participants uniques ont terminé les ECR) et 29 méta-analyses ont été analysés.

**Résultats.** Des recommandations provisoires (WSFBP-Grade 1) ont pu être formulées pour deux molécules en augmentation des antipsychotiques : 1) la N-acétyl-cystéine (NAC, de 1 200 à 3 600 mg/jour, pendant >12 semaines consécutives) pour améliorer les symptômes négatifs, la psychopathologie générale, les ECR de plus longue durée montrant les résultats les plus solides ; 2) les acides gras polyinsaturés (AGPI, 3 000 mg/jour d'EPA, pendant >12 semaines) pour améliorer la psychopathologie générale. Des recommandations moins solides (c'est-à-dire WSFBP-Grade 2) ont pu être formulées pour la sarcosine (2 g/jour) et la minocycline (200-300 mg/jour) pour améliorer les symptômes négatifs de la schizophrénie chronique (pas de la schizophrénie précoce), ainsi que la NAC pour améliorer les symptômes positifs et la cognition. Les recommandations faibles ne sont pas prêtes pour la pratique clinique. Il existe des preuves provisoires que les estrogènes et le raloxifène sont efficaces chez certains patients, mais des recherches supplémentaires sont nécessaires pour déterminer leur ratio bénéfice/risque.

**Conclusions.** Les résultats de cette revue parapluie doivent être interprétés avec prudence, car le nombre d'ECR inclus dans les méta-analyses était généralement faible et les tailles d'effet étaient faibles ou moyennes. Pour la NAC, deux ECR présentant un faible risque de biais ont fourni des résultats contradictoires et la recommandation WSFBP-Grade a également inclus les résultats des méta-analyses. Ces médicaments pourraient être provisoirement prescrits aux patients pour lesquels aucun autre traitement n'a été efficace, mais ils devraient être interrompus s'ils s'avèrent inefficaces. Ces recommandations appellent à des recherches ciblées pour identifier les patients les plus susceptibles de bénéficier de ces agents d'appoint non psychotropes.
